# Supplementary material for: Environmental conditions of a salt-marsh biodiversity experiment on the island of Spiekeroog (Germany)
Source: Copernicus journal article supplement (doi:10.5194/essd-2018-65), 2018-05-18
Supplement: Supplementary file [file essd-2018-65-AC1-supplement.pdf]

## ***Authors comment on “Environmental conditions of a salt-marsh biodiversity experiment on the island of Spiekeroog (Germany)”***

First of all, we thank the two reviewers for their time and due diligence in reading and commenting on our manuscript. In the following we will reply to all referee comments (RC1 and RC2) with the reply in blue and changes in the manuscript in green.

### **Review RC1, by Jaume Piera.**

In this contribution the authors report the abiotic parameters observed from 23 sensors installed around the facilities installed in the framework of the project BEFmate.

My major concern is about the data quality procedures. According to the method described by the authors, quality control was performed by a) erasing negative readings and data covering maintenance activities, b) visual inspection of the overall dataset and c) removal of outliers, defined as data exhibiting changes of more than two standard deviations within one time step.

Although the authors mention that data quality assurance and quality measures will be further developed, this primary quality control has some potential problems: “Visual inspection of the overall dataset” is always a fuzzy concept that provably change the criteria among different sensors. Furthermore, it is not reproducible.

At present there are several publications and guidelines to apply widely accepted criteria for data quality control of oceanographic data. See for example the guideline from SeaDataNet: <https://www.seadatanet.org/Standards/Data-Quality-Control>

Authors response: Thank you for highlighting this relevant aspect. The manual data inspection is a curation process that was used a) for cutting out time periods of sensor services and b) for time periods where sensors fell dry, due to their deployment in a tidal influenced area. The “visual inspection” mentioned in the manuscript was referring to these steps and there were no further “human decisions” involved. We erased the mentioning of “visual inspections” from the text, to avoid misunderstandings. The removal of outliers followed a clear concept, described in the manuscript. Raw data and Matlab routines are available on request. We also added that information to the manuscript.

### **Manuscript changes:**

Section 2: ...”b) visual inspection”... was removed from the manuscript, where mentioned.

In subsection 2.3 we added: “Raw data and Matlab routines applied in the curation process are available on request.”

I suggest also to keep the original data and provide quality flags. It could be recommendable also to include a script to perform the quality actions to apply to the data (delete, interpolate, ...) based on the quality flag information. Using this approach, other authors may apply different quality criteria (with methods that can be improved in the future) if the original raw data is available.

Authors response: Thank you for that suggestion. The original data and Matlab routines used for data curation are archived at UOL servers and available on request. The quality-controlled data is available on Pangaea. We followed the concept of Pangaea database and ESSD that quality controlled and corrected data should be available to the scientific community. The reason behind this is, that raw data, even if flagged, might lead to false scientific interpretations, when downloaded by unexperienced users that do not understand and therefore ignore the flagging terminology. We added information to the manuscript, to clarify the availability of raw data and Matlab routines.

Manuscript changes:

In subsection 2.3 we added: "Raw data and MATLAB routines applied in the curation process are available on request."

I think that it could be interesting to justify how the sampling frequency was selected for each sensor: it was based mostly for operational limitations? or it was designed for the overall goals of the project?

Authors response: Thank you for raising that question. The sampling frequency was indeed a mixture of system limitations and the overall goal to measure tidal changes (the dominant tide is M2 with 12.4 h tidal period, therefore at minimum 48 samples per tide were assumed) over a long period between services. Service frequency in a UNESCO World Heritage Site is limited to reduce impacts on the environment. Therefore our access was limited to maximum one service per month. To avoid data loss if a service would be not possible based on e.g. weather conditions or breeding season, we designed the systems to be operable for at minimum two months. In all cases we could realize and exceed the required sampling (typ. 10 min sampling interval). We added a paragraph to the manuscript.

Manuscript changes:

In subsection 2.2.2 we added: "Sampling interval was chosen to resolve the tidal changes expected (dominant M2 lunar tide with 12.4 h period) while at the same time providing a minimum deployment time of two months between services, to account for the environmental protection regulations in this area. The same sampling interval was applied to the other sensors in this setup, except for the weather station."

## Review RC2, anonymous.

The authors present a detailed explanation of an intertidal monitoring program from northern Germany from September 2014 to April 2017. The topic of biodiversity monitoring is introduced well and its importance in light of a changing climate. They provide a thorough background on their design set up (also with reference to prior work) and detail their monitoring equipment with information regarding their parameters and data acquisition. This is an extensive section that forms the basis of the paper and majority of the text. However, the authors do provide results from the various equipment recordings with accompanying figures and tables. The authors conclude with recommendations for further work in the region.

Authors response: Thank you for your positive feedback.

Minor improvements to the manuscript and figures could be made through comments uploaded in the associated pdf. The results section has no real discussion of their significance despite labelled "results and discussion". Perhaps a discussion is not the basis of the paper or journal though.

Authors response: Thank you for the detailed work on minor issues, that we will comment in the following and were adopted in the manuscript. Concerning the section "results and discussions" you are correct, that the term "discussions" is misleading if seen from the classical point of view of a scientific article. It is, as far as ESSD manuscript preparation guidelines explain it, not necessarily required. Here we used it as a reference to "discuss the data and results with respect to validity and potential limitations of the observational setup" as stated in the introduction (e.g. in section 4.2 or 4.4). The in depth scientific discussion is subject of related publications such as Balke et al. 2017.

Minor changes in the manuscript, according to the reviewers suggestions in the PDF:

- "salt marsh" without "-" throughout the manuscript
- DOIs in abstract is common practice in ESSD (not changed)
- Abstract extended with a final sentence and concluding statements: "A data availability of 80% for 17 out of 23 sensors was achieved. Results showed the influence of seasonal and tidal dynamics on the experimental islands. Nearby salt marsh plots were less influenced by these conditions and exhibited differences e.g. in temperature dynamics. Thus a consistent, multi-parameter, long-term data set is available as a basis for further biodiversity and ecosystem functioning studies."

Introduction:

- Updated reference: Rockström et al. (2009) Nature
- "As a consequence..."
- "intertidal" instead of "near-shore"
- References for salt marsh studies with respect to sea level rise added: Kirwan & Megonigal 2013; Balke et al. 2016

- “Based on this backdrop the project BEFmate “Biodiversity - ecosystem functioning across marine and terrestrial ecosystems” was conducted between Mar 2014 - Dec 2017 aiming to quantify ...”
- consistent use of “experimental salt marsh islands” or “experimental islands” throughout the manuscript
- Sentence introducing the experimental islands and salt marsh plots was simplified, to not reflect methods (removal of technical details)

#### Materials and Methods:

- We kept “Research Area” in this section, since it does not contain sufficient information for a separate section.
- Figure 1: improved with labels “North Sea” and “German Bight”. We did not provide a further North-West-European map since locations and landmarks are sufficiently provided. Country labels “Denmark” and “The Netherlands” added.
- ...“east and west”... caps checked throughout manuscript
- “NHN (normal height null)”
- Figure 2: Labels added. Inserted panel magnified
- ~~“Alike the recording current meter,”~~
- Double abbreviations erased throughout manuscript
- Figure 3: Caption extended to explain the patterns of the experimental island displayed “Experimental islands outer hull (galvanized steel) is patterned in the upper area to allow for a lateral water exchange. Lower area pattern is only meant to reduce weight and ease construction.”

#### Results

- “wind roses” changed to “wind diagrams”
- “was observed” instead of “could be observed”
- ~~“apparently”~~
- Dates mentioned with 01<sup>st</sup> October or alike changed to 1<sup>st</sup> October
- Section 4.4.3 comma added to clarify meaning
- Figure 7 and 10: Colored lines broadened
- Figure 13: Legend enlarged to highlight color selection
- Table 9: Was not properly displayed in the current reproduction. Was reformatted.

#### Conclusions:

- ~~“utilizing among others”~~
- ~~“or allow us to plan event based sampling”~~

# Environmental conditions of a salt-marsh biodiversity experiment on the island of Spiekeroog (Germany)

Oliver Zielinski<sup>1</sup>, Daniela Meier<sup>1</sup>, Kertu Lõhmus<sup>2</sup>, Thorsten Balke<sup>3</sup>, Michael Kleyer<sup>2</sup>, Helmut Hillebrand<sup>1,4</sup>

5 <sup>1</sup>Institute for Chemistry and Biology of the Marine Environment, University of Oldenburg, Wilhelmshaven, 26382, Germany

<sup>2</sup>Institute of Biology and Environmental Sciences, University of Oldenburg, Oldenburg, 26129, Germany

<sup>3</sup>School of Geographical and Earth Sciences, University of Glasgow, Glasgow, G128QQ, UK

<sup>4</sup>Helmholtz-Institute for Functional Marine Biodiversity, University of Oldenburg, Oldenburg, 26129, Germany

*Correspondence to:* Oliver Zielinski (oliver.zielinski@uol.de)

10 **Abstract.** Field experiments investigating biodiversity and ecosystem functioning require observation of abiotic parameters, especially when carried out in the intertidal zone. An experiment for biodiversity-ecosystem functioning ~~at the intersection of land and sea~~ was set up in the intertidal zone of the back-barrier salt marsh of Spiekeroog Island in the German Bight. Here, we report the accompanying instrumentation, maintenance, data acquisition, data handling and data quality control as well as monitoring results observed over a continuous period from September 2014 through April 2017. Time series of  
15 abiotic conditions were measured at several sites in the vicinity of newly built experimental ~~‘salt-marsh islands’~~ islands on the tidal flat. Meteorological measurements were conducted from a weather station (WS, doi: 10.1594/PANGAEA.870988), oceanographic conditions were sampled through a bottom mounted recording current meter (RCM, doi: 10.1594/PANGAEA.877265) and a bottom mounted tide and wave recorder (TWR, doi: 10.1594/PANGAEA.877258). Tide data are essential to calculate flooding duration and flooding frequency with respect to different salt marsh elevation zones.  
20 Data loggers (DL) for measuring water level (DL-W, doi: 10.1594/PANGAEA.877267), temperature (DL-T, doi: 10.1594/PANGAEA.877257), light intensity (DL-L, doi: 10.1594/PANGAEA.877256) and conductivity (DL-C, doi: 10.1594/PANGAEA.877266) were deployed at different elevational zones within the experimental islands and the investigated salt marsh plots. ~~A data availability of 80% for 17 out of 23 sensors was achieved. Results showed the influence of seasonal and tidal dynamics on the experimental islands. Nearby salt marsh plots were less influenced by these conditions and exhibited some differences e.g. in temperature dynamics. Thus, a consistent, multi-parameter, long-term data set is available as a basis for further biodiversity and ecosystem functioning studies.~~

## 1 Introduction

Biodiversity is changing at an unprecedented high rate (Mace et al. 2005), reflecting the anthropogenic alteration of Earth's ecosystems (Vitousek/Rockström et al. 1997). In 2009, As a consequence, research on biodiversity - ecosystem function  
30 (BEF) relationships has become a major facet of ecology and evolutionary biology (Balvanera et al. 2006; Cardinale et al.

2006; Hillebrand & Matthiessen 2009; Cadotte et al. 2008; Gravel et al. 2011a). ~~The research~~Research on BEF has been dominated by experimental studies manipulating the number of species in a trophic group (Hillebrand & Matthiessen 2009). However, the change in the number of species is not the predominant pattern in biodiversity change, which more frequently comprises altered dominances and species turnover (Hillebrand et al. 2017). Moreover, the mechanisms involved in altering species composition, i.e. immigration and extinction, are usually experimentally prohibited in most BEF studies, e.g. via weeding. On the other hand, there have been recent advances in understanding the interaction between regional community assembly, local dynamics and the biodiversity-functioning aspects (Hodapp et al. 2016; Leibold et al. 2017), which should be incorporated in BEF experiments.

The intertidal zone represents an interface between terrestrial and marine processes and biodiversity. This area is sensitive to climate change and is heavily impacted by anthropogenic activities (Cooley and Doney 2009; Ekstrom et al. 2015; Haigh et al. 2015; Mathis et al. 2015). Within the ~~near-shore~~intertidal environment, salt marshes have increasingly gained attention in times of sea-level rise (Kirwan & Megonigal 2013; Balke et al. 2016) but studies on metacommunity dynamics remain scarce.

~~The aim of~~Based on this backdrop the project BEFmate “Biodiversity - ecosystem functioning across marine and terrestrial ecosystems” was ~~conducted between March 2014 - December 2017 aiming~~ to quantify the dynamics of biodiversity and associated functions of salt marsh and tidal flat ecosystems. For this purpose, a series of ~~12 artificial islands (I-12) constructed from galvanized steel and filled with sediment from the tidal flat~~experimental islands were set up in September 2014 on the back-barrier tidal flat of Spiekeroog island in the German East Frisian Wadden Sea (Balke et al. 2017). ~~The experimental salt marsh islands) and~~ were mirrored by ~~12~~ salt marsh enclosed plots (~~S-1-12) at three different elevations~~ located within the nearby salt marsh ~~on Spiekeroog~~. Here we report abiotic parameters observed from 23 sensors installed either near the experimental islands, within the island structures themselves or within the nearby salt marsh as well as meteorological data from a locally installed weather station. We describe the instrumentation, data handling and results observed over a period of 32 months starting from mid of September 2014. We ~~will~~ further discuss the data and results with respect to validity and potential limitations of the observational setup.

## 2 Materials and Methods

### 2.1 Research Area

The island of Spiekeroog is located in the Southern North Sea (Fig. 1) and is part of the Wadden Sea that has been renowned as an UNESCO world natural heritage since 2012. Twelve experimental islands (I1 - I12) were built in the back-barrier tidal flats at distances of 240 m (I12) to 460 m (I1) from the southern salt marsh of the island of Spiekeroog. The experimental islands were distributed unevenly over 810 m from ~~East~~east to west at an elevation of 0.8 m NHN; ~~(normal height null)~~, with a mean tidal range of 2.7 m (Fig. 2, numbered 1-12 from ~~East~~east to ~~West~~west). The islands were built in a northeast-southwest direction with the lowest elevation at the northeast end of the island. The actual sensor position on the islands was

determined by the local bathymetry since the experimental islands encompass three different elevation levels (Fig. 3), reflecting pioneer zone (Pio; 1.5 m NHN), lower salt marsh zone (Low; 1.8 m NHN) and upper salt marsh zone (Upp; 2.1 m NHN) of natural salt marshes. Half of the experimental islands were filled with mudflat sediment and left bare, whereas half of them were additionally transplanted with sods from the lower salt marsh zone of the natural adjacent salt marsh. ~~These~~ Experimental islands represent a treatment of dispersal limitation, constraining community assembly on the islands. Additionally 12 equally treated salt marsh enclosed plots (S 1-12) were created (Fig. 2) that reflect unlimited dispersal. In addition to experimental plots, six control plots (C) per each salt marsh elevation zone were marked but left natural to compare established communities with the community assembly on dispersal limited island and unlimited ~~saltmarshsalt~~ marsh plots. The experimental design and setup of the ~~artificial~~experimental islands are not subject of this work and are described in detail in Balke et al. (2017). Abiotic conditions were measured at several sites due to the involvement of wide selection of parameters. Details concerning the individual sensors, their location, data provided and the associated methods of data handling are provided in the following subsections. All positions, coordinates as well as elevations of sensors are indicated and provided in table 1.

## 2.2 Instrumentation and Data Processing

### 2.2.1 Weather Station (WS)

Meteorological data were collected near the experimental setup (see table 1) with a locally installed weather station located approximately 500 m north of the southern shoreline (53°45'57.10" N, 007°43'34.11" E). The system was installed at the end of a glass fibre pole at a height of 10 m. The weather station system used here was a ClimaSensor US 4.920x.00.00x, that was pre-calibrated by the manufacturer (Adolf Thies GmbH & Co. KG, D-Göttingen). Data were recorded and saved within the Meteo-Online (V4.5.0.20253) software in a sampling interval of 1 minute with an averaging time of 10 seconds, with date and time were given in UTC. Position, solar azimuth angle and solar elevation were derived from the internal GPS-system. Ultrasonic propagation time measurements were used for the determination of wind speed and direction. Two sensors were integrated for measuring air temperature and relative humidity (precision combination sensor) as well as atmospheric pressure (micro-electro-mechanical system (MEMs) technology). For recording and calculating precipitation, the back reflected signal of a Doppler radar was used. Additional four photo sensors were used for the identification of light direction and light intensity. Post-processing of collected data was done using MATLAB (R2012b). Further quality control was performed by a) erasing negative readings and data covering maintenance activities, ~~b) visual inspection of the overall dataset and e and b)~~ removal of outliers, defined as data exhibiting changes of more than two standard deviations within one time step. As the weather station was not oriented directly towards ~~Northnorth~~, a manually ~~Northnorth~~ correction had to be done afterwards for accurate wind direction values (+ 20° from Nov. 2014 to Mar. 2016 and + 10.1° since Oct. 2016).

### 2.2.2 Recording Current Meter (RCM)

A RCM9 LW recording current meter (AADI, Aanderaa, Bergen/Norway; RCM DCS 4220) with additional temperature (3621), conductivity (3919), and pressure (4017) probes was deployed for deriving hydrographic conditions (see table 1). The device was bottom mounted through a buried H-anchor between islands 6 (I6) and 7 (I7) (53°45'29.34" N, 007°43'16.50" E), approximately 35 m southeast of island 7 and 50 m southwest of island 6 in a shallow tidal creek (0.71 m NHN). The position was derived from a portable DGPS-system (Leica Differential-GPS, SR530). The acoustic sensor head was placed 0.4 m above the sediment at 1.2 m above mean low water height. In consequence, the sensor head fell dry during low tide and data had to be examined and eliminated accordingly. The sensor was pre-calibrated by the manufacturer. Recorded data were internally logged on a memory card (DSU 2990 E), with a sampling interval of 10 minutes, until readout with the Data Reading Program DRP 5059 software. Sampling interval was chosen to resolve the tidal changes expected (dominant M2 lunar tide with 12.4 h period) while at the same time providing a minimum deployment time of two months between services, to account for the environmental protection regulations in this area. The same sampling interval was applied to the other sensors in this setup, except for the weather station. Date and time was given in UTC. Post-processing was performed using MATLAB (R2012b) to remove low tide data. Conductivity values were used as an indicator of low tide periods. Data were erased when conductivity values fell below 25 mS/cm. Further quality control was applied as described in section 2.2.1 for the weather station (WS).

### 2.2.3 Tide and Wave Recorder (TWR)

Local tide and wave conditions were recorded with a RBRduo TD | wave sensor (RBR Ltd., Ontario/Canada). The sensor was bottom mounted in a shallow tidal creek (0.71 m NHN) through a steel girder (buried 0.3 m deep in the sediment) next to the RCM 9 LW recording current meter between island 6 and 7 (53°45'29.34"N, 007°43'16.50"E) (see table 1). The sensor was ~~thus~~ positioned 10 cm above sediment surface, as was determined by using a portable differential GPS (Leica Differential-GPS, SR530). ~~Al~~~~ike the recording current meter, this~~This resulted in sensor falling dry during low tide and data had to be flagged accordingly. The sensor was pre-calibrated by the manufacturer and the sampling rate was 3 Hz with 1024 samples per burst at a sample interval of 10 minutes. Recorded data were internally logged until readout with the Ruskin (V1.13.10) software and post-processed using MATLAB (R2012b). Date and time was given in UTC. For accurate depth calculations, raw pressure data were manually corrected for atmospheric pressure derived from the locally installed weather station. Low tide data was not removed, but was easily identified through the manually calculated water depth data, where all depths < 0.05 m represented low tide data. Again, quality control was applied as described in section 2.2.1 for the ~~weather station (WS)-WS.~~



#### 2.2.4 Data Logger (DL)

Several data loggers were installed within the experimental islands as well as the salt marsh enclosed plots for the observation of groundwater level, temperature, light and salinity (see table 1). In all cases date and time is given in UTC and all post-processing was performed using MATLAB (R2012b). Quality control was applied as described in section 2.2 for the weather station (WS).

To get a continuous observation of flooding and the groundwater levels inside the experimental islands as well as in the salt marsh, pressure loggers were deployed in dip wells within the experimental setup at different elevational levels. Six HOBOb® U20L Water Level Logger (onset® HOBOb® Data Loggers, Bourne, MA/USA; S/N 10685287, 10685288, 10685289, 10685290, 10685291, 10685292; Hobo-P) as well as a DEFI-D Miniature Pressure Recorder (S/N OA5K008; DEFI-D) were deployed. All water level loggers were pre-calibrated by the manufacturer. Recorded data were internal logged until readout afield with the Hobo Underwater Shuttle (U-DTW-1) and the HOBObware Pro (V3.7.4) software respectively with the DEFI Series software (V1.02). For depth calculations, pressure data were manually corrected by atmospheric pressure. Accordingly, one ~~of the~~ HOBOb® U20L Water Level Logger was installed outside the dip wells at a higher elevation, attached on a steel pole at the upper zone of island 3. All loggers were initially calibrated to get the exact height inside the dip well. Data of one Hobo Logger had to be corrected with -0.082 m due to a wrong initial measurement. Further corrections were applied to the DEFI-D logger since a manual~~ly~~ correction with atmospheric pressure was not possible. As the local maxima of ~~the~~ other water level loggers were very similar, a mean value of ~~the~~ other loggers was calculated to correct the DEFI-D logger values with +0.25 m.

Temperature in sediment surface layer (in approximately 0.05 m depth) was measured with six DEFI-T Miniature Temperature Recorders (JFE Advantech Co., Ltd., Tokyo; DEFI-T). The manufacturer pre-calibrated temperature recorders were installed within the experimental island and salt marsh enclosed plots at different elevation levels. Recorded data were internally logged until readout with the DEFI Series software (V1.02).

Light availability was measured with six locally installed light intensity loggers within the experimental islands as well as in the ~~saltmarsh~~salt marsh plots at different elevation levels. The DEFI-L Miniature Light Intensity Recorder (JFE Advantech Co., Ltd., Tokyo; DEFI-L) used here were pre-calibrated by the manufacturer. Recorded data were internal logged until readout with the DEFI Series software (V1.02). Due to different calibrations for under water or above water application, raw data were processed differently and merged depending on water levels. The processed pressure and depth data of the RBRduo TD | wave sensor was used to identify flooding times and durations of the different elevations.

Two HOBOb conductivity loggers (Onset Computer Corporation, Bourne, MA/USA) were installed inside of dip wells within the experimental islands as well as in the salt marsh enclosed plots at the pioneer zone. Conductivity logger used here were Hobo U24 Conductivity Logger U24-002-C (S/N 10570000, 10599255). The conductivity loggers were pre-calibrated by the manufacturer. Recorded data were internal logged until readout afield with the Hobo Underwater Shuttle (U-DTW-1) and in the following with the HOBObware Pro (V3.7.4) software. An automatic calculation of salinity was conducted within the

software according to PSS-78 using the measured conductivity and temperature. Due to fluctuations in ground water level, conductivity loggers periodically fell dry, especially in the beginning of the deployment. Data until October 2015 are therefore very scattered. Thereupon the depth of conductivity loggers were adjusted to the bottom of the dip wells assuring a constant coverage with water. Data from dry sensors was removed, using a salinity of 20 psu as a threshold value. As a reference, soil samples of all plots within the experimental islands and salt marsh enclosed plots were sampled to analyze pore water salinity in laboratory (data not shown here). Comparative data of meteorological and hydrographic conditions for validation processes were taken from the nearby Time Series Station - Spiekeroog (TSS) at Otzumer Balje (Holinde et al. 2015; Baschek et al. 2017).

### 2.3 Data Provenance, Structure and Availability

All datasets described herein are available at the World Data Center PANGAEA (www.pangaea.de) searching for “BEFmate” as identifier (Zielinski et al. 2017a – 2017g). Due to extensive datasets as well as individual questions of potential users, a collection (parent) for each sensor (type) was created. Each parent serves as a basis where data are divided into monthly sections enabling an easy selection of required time periods. [Raw data and MATLAB routines applied in the curation process are available on request](#)

#### 2.3.1 Weather Station (WS)

Data of meteorological observations are available at PANGAEA for Nov 2014 to Apr 2017 (doi: 10.1594/PANGAEA.870988). Gaps in the dataset resulted from a malfunction of the pressure sensor and an adjacent maintenance and re-calibration by the manufacturer. The structure of dataset is shown in table 2.

#### 2.3.2 Recording Current Meter (RCM)

Continuous current data are available on PANGAEA for Sep 2014 to Oct 2015 (doi: 10.1594/PANGAEA.877265). There are additional datasets before the main sampling period for Nov/Dec 2013, Mar 2014, and Jun 2014. These data were used as a basis for deciding on the final placement and orientation of the experimental island. Gaps in the dataset are resulting of local readouts and maintenance. Low-tide data were removed from the dataset. Data after October 2015 is missing due to sensor malfunctions. Structure of the datasets is shown in table 3.

#### 2.3.3 Tide and Wave Recorder (TWR)

Tide and wave data are available on PANGAEA for Oct 2014 to Apr 2017 (doi: 10.1594/PANGAEA.877258). Gaps in the dataset are resulting from local readouts and maintenance. Low-tide data was not removed from the dataset. The depth was calculated from raw pressure, which was before corrected with atmospheric pressure. Structure of the datasets is described in table 4.

### 2.3.4 Water Level Loggers (DL-W)

Data for groundwater level within the experimental islands and salt marsh enclosed plots are available on PANGAEA for Jun 2015 to Apr 2017 (doi: 10.1594/PANGAEA.877267). Gaps in the dataset are resulting of local readouts and maintenance. For depth calculations, pressure data were manually corrected by atmospheric pressure. Each dataset includes  
5 date/time and water level (water level [m]) (table 5).

### 2.3.5 Temperature Loggers (DL-T)

Temperature data for the surface sediment layer of the experimental islands and salt marsh enclosed plots are available on PANGAEA for Sep 2014 to Apr 2017 (doi: 10.1594/PANGAEA.877257). Gaps in the dataset are resulting from local readouts and maintenance. Each dataset includes date/time, depth in sediment (Depth [m]) and temperature in sediment (t  
10 [degC]) (table 6).

### 2.3.6 Light Loggers (DL-L)

Measured light availability within the experimental islands and salt marsh enclosed plots are available on PANGAEA for Sep 2014 to Apr 2017 (doi: 10.1594/PANGAEA.877256). Gaps in the dataset are resulting from local readouts and maintenance. Due to different calibrations for under water or above water application, raw data were processed differently  
15 and were merged depending on low or high water times. Each dataset includes date/time and light intensity ( $I_0$  [ $\mu\text{mol}/\text{m}^2\text{s}$ ]) (table 7).

### 2.3.7 Conductivity Loggers (DL-C)

Data of conductivity measurements inside dip wells within the experimental islands and salt marsh enclosed plots are available on PANGAEA for May 2015 to Apr 2017 (doi: 10.1594/PANGAEA.877266). Gaps in the dataset are resulting of  
20 local readouts and maintenance. Low-tide data was removed from the dataset. An automatic calculation of salinity were performed within the HOBOWare Pro (V3.7.4) software according to PSS-78. Each dataset includes date/time, depth in sediment (Depth [m]) and Salinity (Sal [-]) (table 8).

## 3 Data availability

Sensor operation encompasses the time span of 32 month from 18th Sep 2014 until 18th Apr 2017 (944 days). Figure 4  
25 illustrates the data availability over the whole period and table 9 provides total availability in days as well as in percent.

### 3.1 Weather Station (WS)

Within this time frame meteorological data was available from 19th Nov 2014 to 18th Apr 2017 on 571 days (corresponding to 60.49 % availability). Days absent resulted from malfunctions and maintenances from 29th Jan 2015 to 11th Mar 2015, ~~04th~~4th Nov 2015 to 14th Nov 2015, 25th Mar 2016 to 28th Oct 2016, ~~01st~~1st Feb 2017 to 21st Mar 2017.

### 5 3.2 Recording Current Meter (RCM)

Current meter operation was possible from 18th Sep 2014 until ~~06th~~6th Oct 2015 on 335 days (35.49 %). Further operations occurred in Nov/Dec 2013, Mar 2014 and Jun 2014 for preliminary investigations. Missing days were resulted from local maintenance and readouts. Due to a malfunction, the sensor was not operating since Oct 2015.

### 3.3 Tide and Wave Recorder (TWR)

10 | Continuous observations of wave and tide data were feasible from ~~01st~~1st Oct 2014 to 18th Apr 2017 on 812 days (corresponding to 86.02 % availability). Days absent were a result of local maintenance and readouts as well as some extended services from 19th Oct 2014 to 28th Oct 2014, 17th Aug 2015 to 23rd Sep 2015, and ~~08th~~8th Nov 2016 to 24th Jan 2017.

### 3.4 Data Logger (DL)

#### 15 3.4.1 Water Level Loggers (DL-W)

Within the total time period water level measurements were performed from 20th Jun 2015 to 18th Apr 2017 on 578 days (572 days within the salt marsh enclosed plot) resulting in a 61.23 % (60.59 %) availability. Days absent resulted from malfunctions and maintenances from 16th Feb 2016 to 18th May 2016 as well as some local readouts. Groundwater level data of the DEFI-D logger ends at 10th Jan 2017 due to a missing readout in April 2017. The coverage of water level  
20 | measurements is therefore 50.85 % (480 days).

#### 3.4.2 Temperature Loggers (DL-T)

Recording of surface layer temperature were available on 931 days, excluding the period from 10th Jan 2017 to 24th Jan 2017 due to maintenance (98.62 % availability). However, temperature data of two loggers within the salt marsh enclosed plots (S2Upp and S2Low) are exhibiting a shorter time of deployment. An application was possible at 295/380 days (31.25  
25 | % / 40.25 % availability) from 16th Dec 2014 to ~~06th~~6th Oct 2015 (S2Upp and S2Low) and further from 24th Jan 2017 to 18th Apr 2017 (S2Low).

### 3.4.3 Light Loggers (DL-L)

Light intensity and availability was recorded over the whole period from 18th Sep 2014 to 18th Apr 2017 for 931 days, except from 10th Jan 2017 to 24th Jan 2017, due to maintenance (98.62 % availability). Two loggers (I3 Pole, Seafloor) were first installed on 7th Oct 2015 with a total application time of 547 days corresponding to 57.94 % availability. One light  
5 logger within the salt marsh enclosed plot (S3Low) had to be removed from 19th Nov 2014 to 16th Dec 2014 due to maintenance. One light logger within the experimental island (I3Low) had to be temporarily removed between 23rd Sep 2015 and 11th Apr 2016.

### 3.4.4 Conductivity Loggers (DL-C)

10 | Data of the conductivity logger within the experimental island (I3Pio) ~~is-are~~ available from ~~06th~~6th May 2015 to 16th Feb 2016 and from 18th May 2016 to 18th Apr 2017 on 624 days (66.10 % availability). The logger located in the salt marsh enclosed plot (S3Pio) recorded water conductivity from ~~07th~~7th May 2015 to 08th Oct 2015, ~~03rd~~3rd Dec 2015 to 16th Feb 2016 and from 18th May 2016 to 18th Apr 2017 in total 567 days (60.06 % availability). Gaps in the dataset resulted from a malfunction and maintenance.

## 4 Results and discussion

### 15 4.1 Weather Station (WS)

Local wind ~~roses~~roses diagrams for three winter storm seasons and one summer season are shown in figure 5. Furthermore, minima, maxima and mean values as well as median and standard deviation of the ~~Weather Station (WS)~~weather station for the time frame of 19th Nov 2014 to 18th Apr 2017 on 571 days are listed in table 10. Within the application time, wind speeds of less than 25 m-/s were present. Mean wind speed was 5.7 m/s  $\pm$  3.21 but it strongly ~~differ~~differs between the single  
20 seasons.

### 4.2 Recording Current Meter (RCM)

Current conditions for one storm season and one summer season are shown in figure 6. A main current direction from southwest to northeast were clearly identified showing the good orientation of the experimental islands. Furthermore, minima, maxima and mean values as well as median and standard deviation of the RCM data from 18th Sep 2014 until  
25 | ~~06th~~6th Oct 2015 on 335 days are listed in table 11. A maximum current speed of 107.05 cm/s ~~could-be~~was observed in Dec 2013 during storm Xaver. Mean current speed represent 12.9 cm/s  $\pm$  8.62, but with variances between the single seasons.

### 4.3 Tide and Wave Recorder (TWR)

Water depth, calculated from pressure data of the Tide and Wave Recorder (TWR) can be seen in figure 7. ~~A seasonal variability pattern of water depth is exhibited during seasons are obviously for some parameters and apparently~~ highest water depth were reached during storm season. However, water level reached the upper salt marsh zone (2.0 m NHN) several times (e.g. Apr 2015, Jul 2015, Aug 2016). During the storms Elon and Felix in Jan 2015 highest water level was observed with 3.62 m as well as the highest wave with 2.14 m (Fig. 8). ~~Anyhow, t~~The highest wave energy (400.90 J/m<sup>2</sup>) and significant wave height H1/3 (0.73 m) were detected during several shortly sequenced storm events the weeks before in Dec 2014 (Fig. 8). Mean water depths for the whole application are 1.23 m ±0.35 m. Statistic values of the TWR from ~~01st1st~~ Oct 2014 to 18th Apr 2017 on 812 days are listed in table 12.

### 10 4.4 Data Logger (DL)

#### 4.4.1 Water Level Loggers (DL-W)

Depth of groundwater level achieved from pressure logger inside the experimental islands and salt marsh enclosed plots can be seen in figure 9. Differences in the water level ~~have been were~~ observed especially during low water. This could be a result of various factors ranging from diverse water consumption of plants, less flooding on higher elevations or leaks in the plastic bags inside an experimental island. Statistics of ground water level data (DL-W 1-6) for each logger application time from 20th Jun 2015 to 18th Apr 2017 on 578 days (572 days within the salt marsh enclosed plot) are listed in table 13.

#### 4.4.2 Temperature Loggers (DL-T)

Surface layer temperatures for one experimental island and its three elevational zones as well as one elevation zone within the salt marsh enclosed plots are shown in figure 10. ~~As a basis of~~To assess temperature differences the DL-T2 Logger (I3 Low) was taken to compare both differences within one islands elevational zones (DL-T1 I3 Pio, DL-T3 I3 Upp) and between the same elevational level compared to one of the salt marsh control plots (DL-T4, S3 Low). All temperatures are very similar and showing only less differences, especially I3 Upp and I3 Low with  $\Delta T$  0.01 ± 0.55 °C. Since the temperatures within the experimental islands are very similar considering the mean monthly temperatures of the four plots a clear offset of the salt marsh enclosed plot temperature could be identified in winter and summer month (Fig. 11). Lowest ~~Temperature~~temperature was observed at I3 Pio with -2.6 °C whereas the highest value with 30.43 °C was measured at the upper zone of the experimental island. Maximum temperatures of S3 Low and I3 Upp differ 9.31 °C. Mean values are very similar and reaching from 9.64°C ± 5.02 (S3 Low) to 9.78 ± 5.74 (I3 Pio). More statistics of temperature data (DL-L 1-6) for each logger application time from 18th Sep 2014 until 18th Apr 2017 on 931 days are listed in table 14.

#### 4.4.3 Light Loggers (DL-L)

To calculate light sum per day, measured light intensity (Quantum [ $\mu\text{mol} / \text{m}^2\text{s}$ ]) was extrapolated from seconds to the measuring interval of 10 minutes and afterwards values were added up for one day. ~~Polycarbonate covers were installed on the experimental islands to prevent the scouring during the storm season (Balke et al. 2017). As storm events were identified as a source for scouring processes, especially in the bare islands (Balke et al. 2017), polycarbonate covers were installed for the experimental islands during storm season beginning in Oct 2015.~~ In consequence, lower light availabilities were detected under the covers (Fig. 12) at island 3 in I3 Pio, I3 Low and I3 Upp other than at the seafloor, I3 Pole and ~~S-3S3~~ Low (all not covered). Minima, maxima and mean values as well as median and standard deviation of the light intensity data (DL-L 1-6) for each logger application over the whole period from 18th Sep 2014 to 18th Apr 2017 for 931 days are listed in table 15.

#### 10 4.4.4 Conductivity Loggers (DL-C)

Salinity values achieved from both conductivity logger within the experimental island and the salt marsh enclosed plot can be seen in figure 13. Due to fluctuations in the ground water level conductivity loggers periodically fell dry especially in the beginning. Thus, data until Oct 2015 are scattered. Thereupon the ~~depth of~~ conductivity loggers were adjusted ~~to~~ deeper in the dip wells assuring a constant covering of water. Mean salinity for the experimental island is  $27.95 \text{ ppt} \pm 1.22$  and for the salt marsh enclosed plot  $25.45 \text{ ppt} \pm 1.74$ . Both ~~logger~~ loggers were installed at the pioneer zone. Statistics of salinities (DL-C 1-2) for each logger application time from ~~06th~~ 6th May 2015 to 16th Feb 2016 and from 18th May 2016 to 18th Apr 2017 on 624 days are shown in table 16.

### 5 Conclusions and future directions

The BEFmate project included a variety of experiments dedicated to investigate biodiversity – ecosystem functioning across marine and terrestrial ecosystems utilizing ~~among others~~ 12 ~~artificial~~ experimental islands in the back-barrier tidal-flat of Spiekeroog Island. Abiotic conditions were recorded from a suite of 23 different sensors installed at different locations in the vicinity of the experimental islands, within the islands themselves and within the nearby salt marsh. Data described here covers the period from Sep 2014 to Apr 2017 and has been published in seven datasets in the World Data Center PANGAEA. Data coverage within the period reached from 35% for the recording current meter (RCM) that failed in October 2015, to 99% for 6 data loggers. With 17 sensors covering 80% or more of the period of interest, a very good coverage was achieved. Additional data from pre-experiment investigations with the RCM between November 2013 and June 2017 was added to the dataset. Seasonal and tidal dynamics, as well as storms were covered and these data are available for interpretation in further contexts.

For future operations data availability can be further increased if a rotational system for maintenance is applied, providing spare sensors are available. Furthermore, online data transfer of central information would not only increase the data availability, but meteorological and hydrographic conditions can indicate the need to attend the experiment. For example,

indicating a need to take actions to prevent damage during extreme weather events ~~or allow us to plan event based sampling.~~ Non-invasive remote sensing sensor techniques can provide complementary data, to avoid fouling issues, as demonstrated successfully at the nearby Time Series Station ~~(TSS)~~-Spiekeroog (Garaba et al., 2014; Schulz et al. 2016). Additionally camera systems should be applied providing a visual impression of the overall scene and detailed information, e.g. the process of flooding for different level. Recently the RCM failure within the BEFmate project has inspired the development of a machine-learning environment that creates a virtual sensor enabling to compensate for single sensor dropouts (Oehmcke et al. 2017a, 2017b). Finally, data quality assurance and quality measures should be further developed to reduce the workload of manual data curation while improving data availability in near-real time.

### **Sample availability**

10 | The dataset described within this document is based on sensor information ~~only~~, that had been uploaded to the PANGAEA database (see section 2.3).

### **Appendices**

None

### **Supplement link**

15 None

### **Author contribution**

Oliver Zielinski was responsible for the scientific approach and performed the interpretation of results. He drafted and prepared the manuscript.

20 Daniela Meier was responsible for technical maintenance, laboratory analysis, performed fieldwork, data sampling and analysis, created figures and contributed to the writing process of the manuscript.

Helmut Hillebrand was principle investigator of the BEFmate project and contributed to the writing process.

Michael Kleyer was principle investigator of one of the BEFmate subprojects and responsible for the conception of the experimental islands.

25 Thorsten Balke and Kertu Lõhmus were responsible for maintenance of the experimental islands as well as fieldwork coordination.

All authors contributed to proof reading of the manuscript.



## Competing interests

The authors declare that they have no conflict of interest.

## Acknowledgements

The authors are very grateful to Kai Schwalfenberg and Claudia Thölen for their tremendous support in the field and laboratory. Sincere thanks to Daniela Voß, Ursel Gerken, Kathrin Dietrich, Nick Rüssmeier, Rohan Henkel, Jule Beßler, Franziska Wöhrmann and Hauke Haake for technical, laboratory or fieldwork support. Special thanks to Helmo Nicolai and Gerrit Behrens for their technical and logistical support. The support and cooperation with Nationalparkverwaltung Niedersächsisches Wattenmeer and the Umweltzentrum Wittbülten is acknowledged as well as the support of Rainer Sieger at PANGAEA. Thanks to the BEFmate colleagues and all other helping hands in the field during sampling campaigns, especially Regine Redelstein. The BEFmate project (Biodiversity - Ecosystem Functioning across marine and terrestrial ecosystems) was funded by the Ministry for Science and Culture of Lower Saxony, Germany under project number ZN2930. [The feedback from two reviewers is gratefully acknowledged.](#)

## References

- Balke, T., [Stock, M., Jensen, K., Bouma, T.J., Kleyer, M.: A global analysis of the seaward salt marsh extent: The importance of tidal range, \*Water Resour. Res.\*, 52, doi:10.1002/2015WR018318, 2016.](#)
- [Balke, T., Löhmus, K., Hillebrand, H., Zielinski, O., Haynert, K., Meier, D., Hodapp, D., and Kleyer, M.: Experimental salt marsh islands: A model system for novel metacommunity experiments, \*Estuarine, Coastal and Shelf Science\* \(198, A\), 288-298, doi:10.1016/j.ecss.2017.09.021, 2017.](#)
- Balvanera, P., Pfisterer, A.B., Buchmann, N., He, J.S., Nakashizuka, T., Raffaelli, D., et al.: Quantifying the evidence for biodiversity effects on ecosystem functioning and services, *Ecol. Lett.*, 9, 1146–1156, doi: 10.1111/j.1461-0248.2006.00963.x, 2006.
- Baschek, B., Schroeder, F., Brix, H., Riethmüller, R., Badewien, T.H., Breitbach, G., Brügge, B., Colijn, F., Doerffer, R., Eschenbach, C., Friedrich, J., Fischer, P., Garthe, S., Horstmann, J., Krasemann, H., Metfies, K., Merckelbach, L., Ohle, N., Petersen, W., Pröfrock, D., Röttgers, R., Schlüter, M., Schulz, J., Schulz-Stellenfleth, J., Stanev, E., Staneva, J., Winter, C., Wirtz, K., Wollschläger, J., Zielinski, O., and Ziemer, F.: The Coastal Observing System for Northern and Arctic Seas (COSYNA), *Ocean Science* 13, 379-410, doi: 10.5194/os-13-379-2107, 2017.
- Beck, M., Reckhardt, A., Amelsberg, J., Bartholomä, A., Brumsack, H-J., Cypionka, H., Dittmar, T., Engelen, B., Greskowiak, J., Hillebrand, H., Holtappels, M., Neuholz, R., Köster, J., Kuypers, M., Massmann, G., Meier, D., Niggemann, J., Paffrath, R., Pahnke, K., Rovo, S., Striebel, M., Vandieken, V., Wehrmann, A., and Zielinski, O.: The drivers of

- biogeochemistry in beach ecosystems: A cross-shore transect from the dunes to the low water-line, *Mar. Chem.* 190, 35-50, doi: 10.1016/j.marchem.2017.01.001, 2017.
- Cadotte, M.W., Cardinale, B.J., and Oakley, T.H.: Evolutionary history and the effect of biodiversity on plant productivity, *Proc. Natl. Acad. Sci. USA*, 105, 17012–17017, doi: 10.1073/pnas.0805962105, 2008.
- 5 Cardinale, B.J., Srivastava, D.S., Duffy, J.E., Wright, J.P., Downing, A.L., Sankaran, M., et al.: Effects of biodiversity on the functioning of trophic groups and ecosystems, *Nature*, 443, 989–992, doi: 10.1038/nature05202, 2006a.
- Cooley, S.R. and Doney, S.C.: Anticipating ocean acidification’s economic consequences for commercial fisheries. *Environ. Res. Lett.* 4, 024007 (8pp), doi:10.1088/1748-9326/4/2/024007, 2009.
- Ekstrom, J.A., Suatoni, L., Cooley, S.R., Pendleton, L.H., Waldbusser, G.G., Cinner, J.E., Ritter, J., Langdon, C., van  
10 Hooidek, R., Gledhill, D., Wellman, K., Beck, M.,W., Brander, L.M., Rittschof, D., Doherty, and C., Edwards, P.E.T.: Vulnerability and adaption of US shellfisheries to ocean acidification, *Nature Climate Change* 5, 207-214, doi: 10.1038/nclimate2508, 2015.
- Garaba, S.P., Badewien, T.H., Braun, A., Schulz, A.C., and Zielinski, O.: Using ocean colour remote sensing products to estimate turbidity at the Wadden Sea time series station Spiekeroog, *Journal of the European Optical Society* 9: 14020-1-  
15 14020-6, doi: 10.2971/jeos.2014.14020, 2014.
- Gravel, D., Bell, T., Barbera, C., Bouvier, T., Pommier, T., Venail, P., and Mouquet, N.: Experimental niche evolution alters the strength of the diversity-productivity relationship, *Nature*, 469, 89-U1601, doi: 10.1038/nature09592, 2011a.
- Haigh, R., Ianson, D., Holt, C.A., Neate, H.E., Edwards, A.M.: Effects of Ocean Acidification on Temperate Coastal Marine Ecosystems and Fisheries in the Northeast Pacific, *PLoS ONE* 10(2): e0117533, doi: 10.1371/journal.pone.0117533, 2015.
- 20 Hillebrand, H. and Matthiessen, B.: Biodiversity in a complex world: consolidation and progress in functional biodiversity research, *Ecology Letters*, 12: 1405-1419, doi: 10.1111/j.1461-0248.2009.01388.x, 2009.
- Hillebrand, H., Blasius, B., Borer, E.T., Chase, J.M., Downing, J.A., Eriksson, B.K., Filstrup, C.T., Harpole, W.S., Hodapp, D., Larsen, S., Lewandowska, A.M., Seabloom, E.W., Van de Waal, D.B., and Ryabov, A.B.: Biodiversity change is uncoupled from species richness trends: consequences for conservation and monitoring, *Journal of Applied Ecology*, 55, 1,  
25 169-184, doi: 10.1111/1365-2664.12959, 2017.
- Hodapp, D., Hillebrand, H., Blasius, B., and Ryabov, A.B.: Environmental and trait variability constrain community structure and the biodiversity-productivity relationship, *Ecology*, 97, 1463-1474, doi: 10.1890/15-0730.1, 2016.
- Holinde, L., Badewien, TH., Freund, JA., Stanev, EV., and Zielinski, O.: Processing of water level derived from water pressure data at the Time Series Station Spiekeroog, *Earth System Science Data* 7, 289-297; doi: 10.5194/essd-7-289-2015,  
30 2015.
- [Kirwan, M.L. and Megonigal, J.P.: Tidal wetland stability in the face of human impacts and sea-level rise, \*Nature\*, 504\(7478\), 53–60, doi:10.1038/nature12856, 2013.](#)
- Leibold, M.A., Chase, J.M., and Ernest, S.K.M.: Community assembly and the functioning of ecosystems: how metacommunity processes alter ecosystems attributes, *Ecology*, 98, 909-919, doi: 10.1002/ecy.1697, 2017.

- Mace, G.M., Masundire, H., Baillie, J., Ricketts, T., Brooks, T., Hoffmann, M., Stuart, S., Balmford, A., Purvis, A., Reyers, B., Wang, J., Revenga, C., Kennedy, E., Naeem, S., Alkemade, R., Allnutt, T., Bakarr, M., Bond, W., Chanson, J., Cox, N., Fonseca, G., Hilton-Taylor, C., Loucks, C., Rodrigues, A., Sechrest, W., Stattersfield, A.J., Van Rensburg, B.J., and Whiteman, C.: Biodiversity. In: Biodiversity in Ecosystems and Human Wellbeing: Current State and Trends (eds. Hassan H, Scholes R & Ash N), doi: 10.1111/acv.12222, 2005.
- Mathis, J.T., Cooley, S.R., Lucey, N., Colt, S., Ekstrom, J., Hurst, T., Hauri, C., Evans, W., Cross, J.N., and Feely, R.A.: Ocean acidification risk assessment for Alaska's fishery sector, *Progress in Oceanography* 136, 71-91, doi: 10.1016/j.pocean.2014.07.001, 2015.
- Oehmcke, S., Zielinski, O., and Kramer, O.: Recurrent neural networks and exponential PAA for virtual marine sensors, *IEEE International Joint Conference on Neural Networks (IJCNN)*, 4459–4466, doi: 10.1109/IJCNN.2017.7966421, 2017a.
- Oehmcke, S., Zielinski, O., and Kramer, O.: Input quality aware convolutional LSTM networks for virtual marine sensors, *Neurocomputing* 275 (2018) 2603–2615, doi: 10.1016/j.neucom.2017.11.027, 2017b.
- [Rockström, J., Steffen, W., Noone, K., Persson, Å, Chapin III, F. S, Lambin, E.F., Lenton, T.M., Scheffer, M., Folke, C., Schellnhuber, H.J., Nykvist, B., de Wit, C.A., Hughes, T., van der Leeuw, S., Rodhe, H., Sörlin, S., Snyder, P.K., Costanza, R., Svedin, U., Falkenmark, M., Karlberg, L., Corell, R.W., Fabry, V.J., Hansen, J., Walker, B., Liverman, D., Richardson, K., Crutzen, P., Foley, J.A.: A safe operating space for humanity, \*Nature\*, 461, 472–475 \(24 September 2009\), 2009.](#)
- Schulz, A.C., Badewien, T.H., Garaba, S.P., and Zielinski, O.: Acoustic and optical methods to infer water transparency at Time Series Station Spiekeroog, Wadden Sea, *Ocean Science* 12, 1155-1163, 2016, doi: 10.5194/os-12-1155-2016, 2016.
- Vitousek, P.M., Mooney, H.A., Lubchenco, J., and Melillo, J.M.: Human domination of Earth's ecosystems, *Science*, 277, 494-499, doi: 10.1126/science.277.5325.494, 1997.
- Zielinski, O., Meier, D., and Hillebrand, H.: Continuous meteorological observations at BEFmate automatic weather station, Spiekeroog, Germany, 2014-11 to 2017-04, Institute for Chemistry and Biology of the Marine Environment, Carl-von-Ossietzky University of Oldenburg, Germany, PANGAEA, doi:10.1594/PANGAEA.870988, 2017a.
- Zielinski, O., Meier, D., Kleyer, M., and Hillebrand, H.: Continuous temperature observations in surface sediment within BEFmate [artificial experimental](#) islands and saltmarsh control plots at different elevation levels, Spiekeroog, Germany, 2014-09 to 2017-04, Institute for Chemistry and Biology of the Marine Environment, Carl-von-Ossietzky University of Oldenburg, Germany, PANGAEA, doi:10.1594/PANGAEA.877257, 2017b.
- Zielinski, O., Meier, D., Kleyer, M., and Hillebrand, H.: Continuous wave and tide observations at BEFmate [artificial experimental](#) islands in the back-barrier tidal flat, Spiekeroog, Germany, 2014-10 to 2017-04, Institute for Chemistry and Biology of the Marine Environment, Carl-von-Ossietzky University of Oldenburg, Germany, PANGAEA, doi:10.1594/PANGAEA.877258, 2017c.
- Zielinski, O., Meier, D., Kleyer, M., and Hillebrand, H.: Continuous current observations at BEFmate [artificial experimental](#) islands in the back-barrier tidal flat, Spiekeroog, Germany, 2013-11 to 2015-10, Institute for Chemistry and Biology of the

Marine Environment, Carl-von-Ossietzky University of Oldenburg, Germany, PANGAEA, doi:10.1594/PANGAEA.877265, 2017d.

Zielinski, O., Meier, D., Kleyer, M., and Hillebrand, H.: Continuous porewater salinity observations within BEFmate ~~artificialexperimental~~ islands and saltmarsh control plots, Spiekeroog, Germany, 2015-05 to 2017-04, Institute for Chemistry and Biology of the Marine Environment, Carl-von-Ossietzky University of Oldenburg, Germany, PANGAEA, doi:10.1594/PANGAEA.877266, 2017e.

Zielinski, O., Meier, D., Kleyer, M., and Hillebrand, H.: Continuous light intensity observations within BEFmate ~~artificialexperimental~~ islands and saltmarsh control plots at different elevation levels, Spiekeroog, Germany, 2014-09 to 2017-04, Institute for Chemistry and Biology of the Marine Environment, Carl-von-Ossietzky University of Oldenburg, Germany, PANGAEA, doi:10.1594/PANGAEA.877256, 2017f.

Zielinski, O., Meier, D., Kleyer, M., Hillebrand, H.: Continuous water level observations within BEFmate ~~artificialexperimental~~ islands and saltmarsh control plots at different elevation levels, Spiekeroog, Germany, 2014-09 to 2017-04, Institute for Chemistry and Biology of the Marine Environment, Carl-von-Ossietzky University of Oldenburg, Germany, PANGAEA, doi:10.1594/PANGAEA.877267, 2017g

15

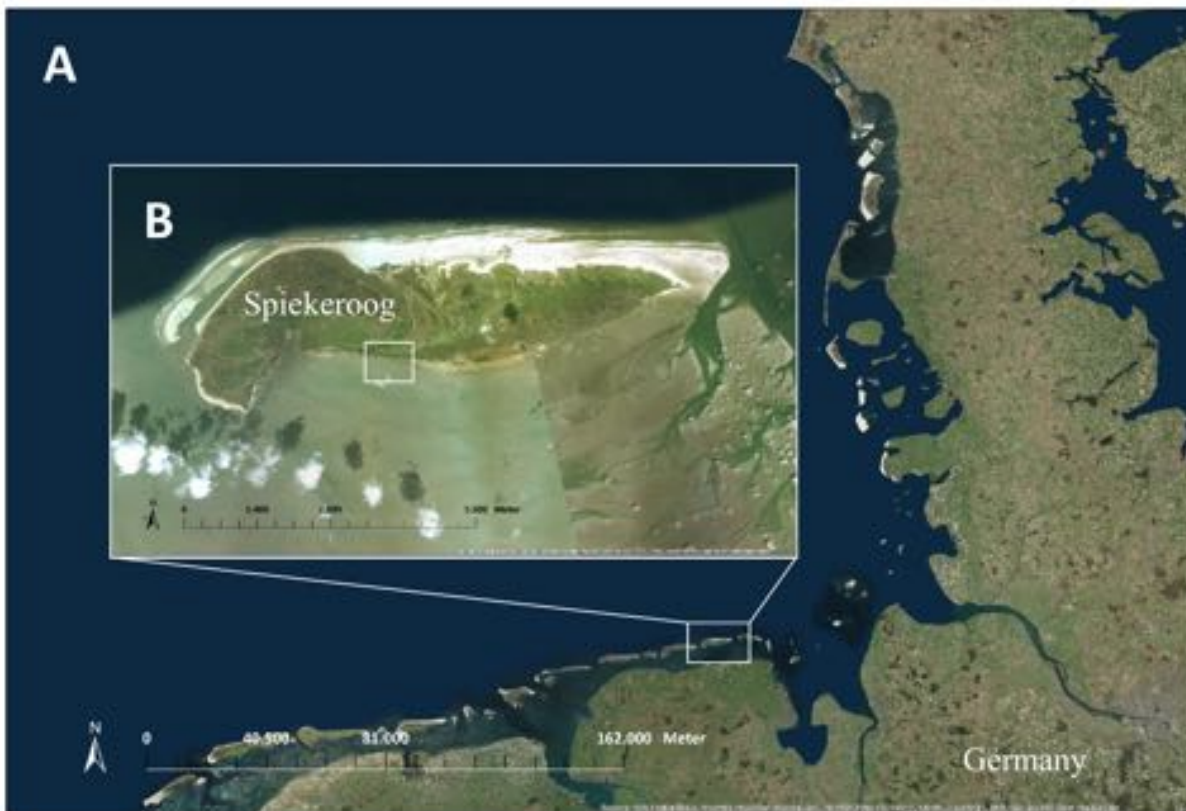

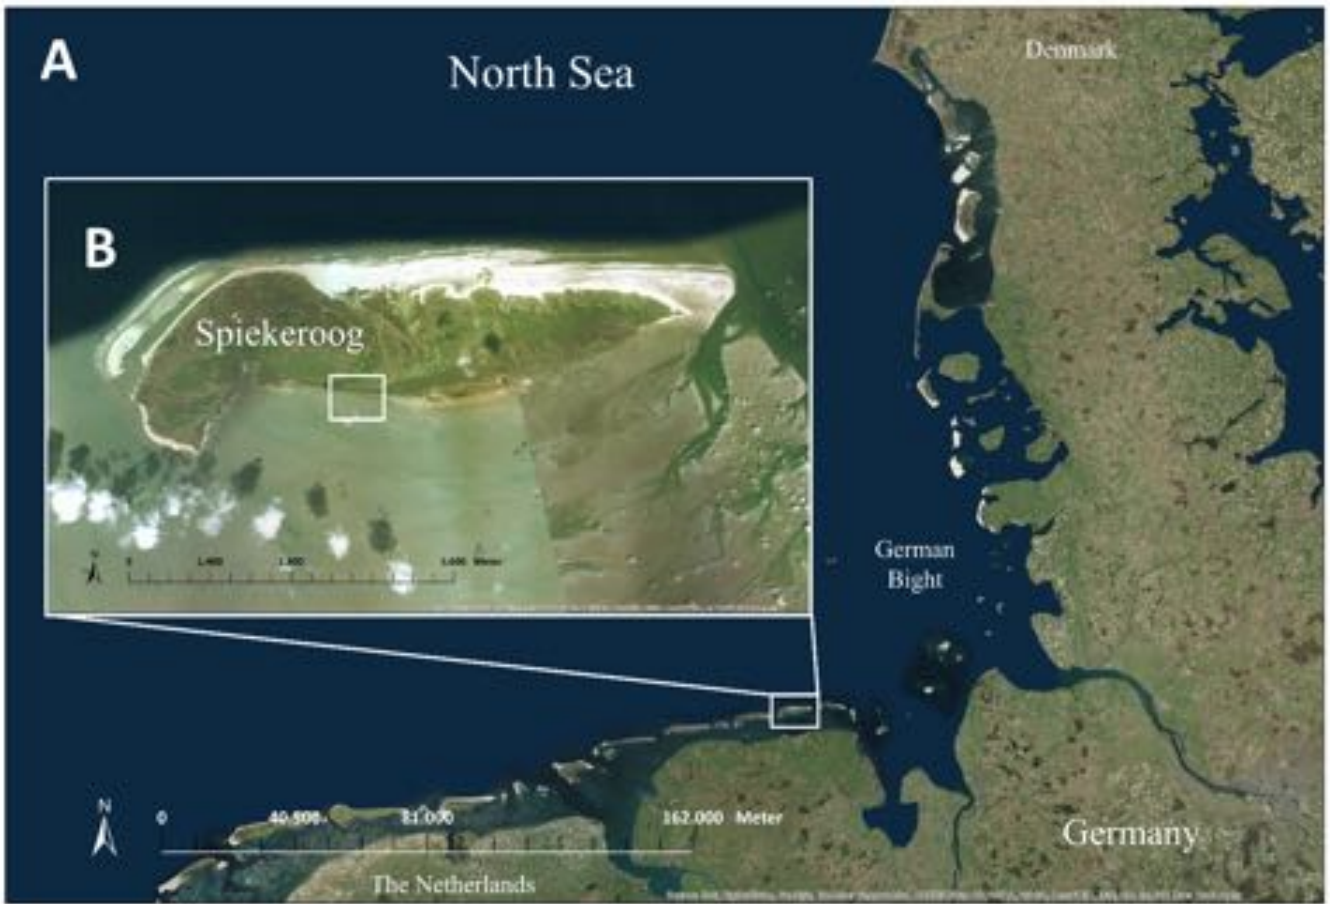

Figure 1: (A) Island of Spiekeroog located in the German Bight (~~Southern~~ North Sea). (B) The study site is located south of Spiekeroog (~~see insert~~) in the back-barrier tidal flat for experimental islands and in the adjacent salt marsh for salt marsh enclosed plots (white box).

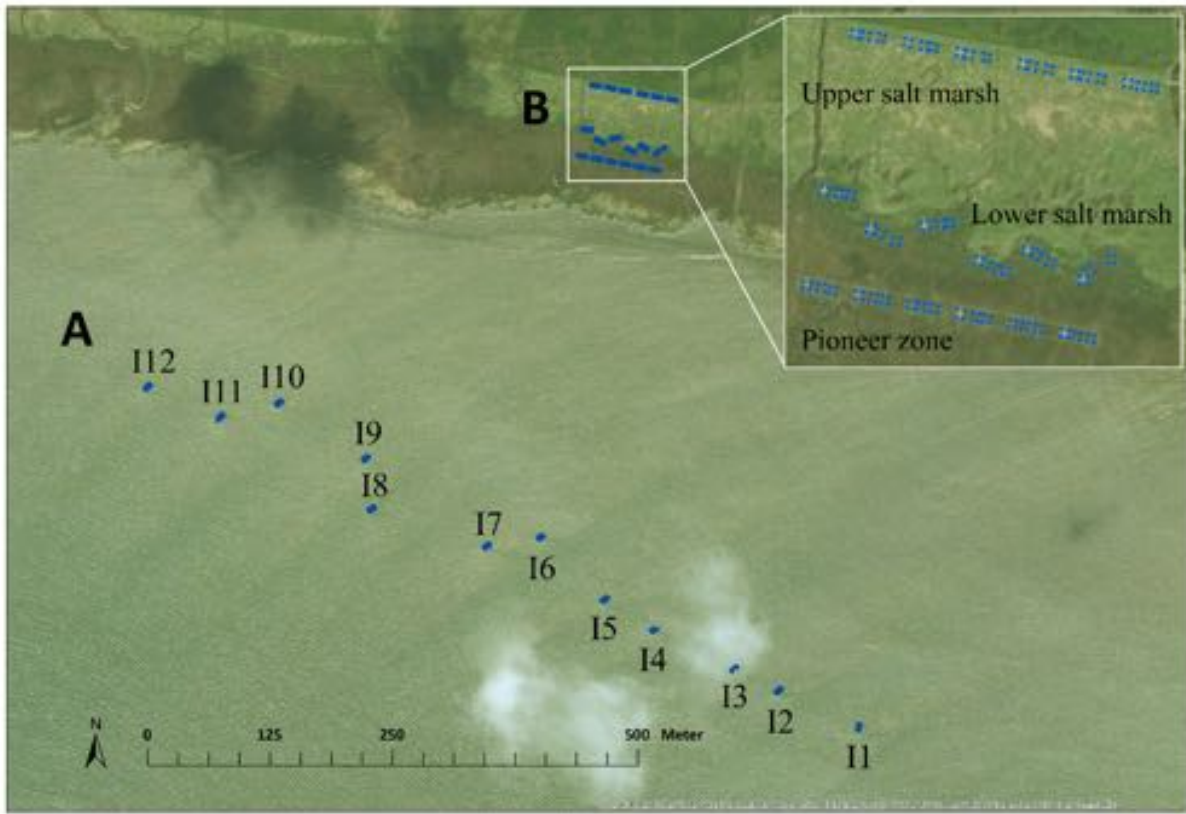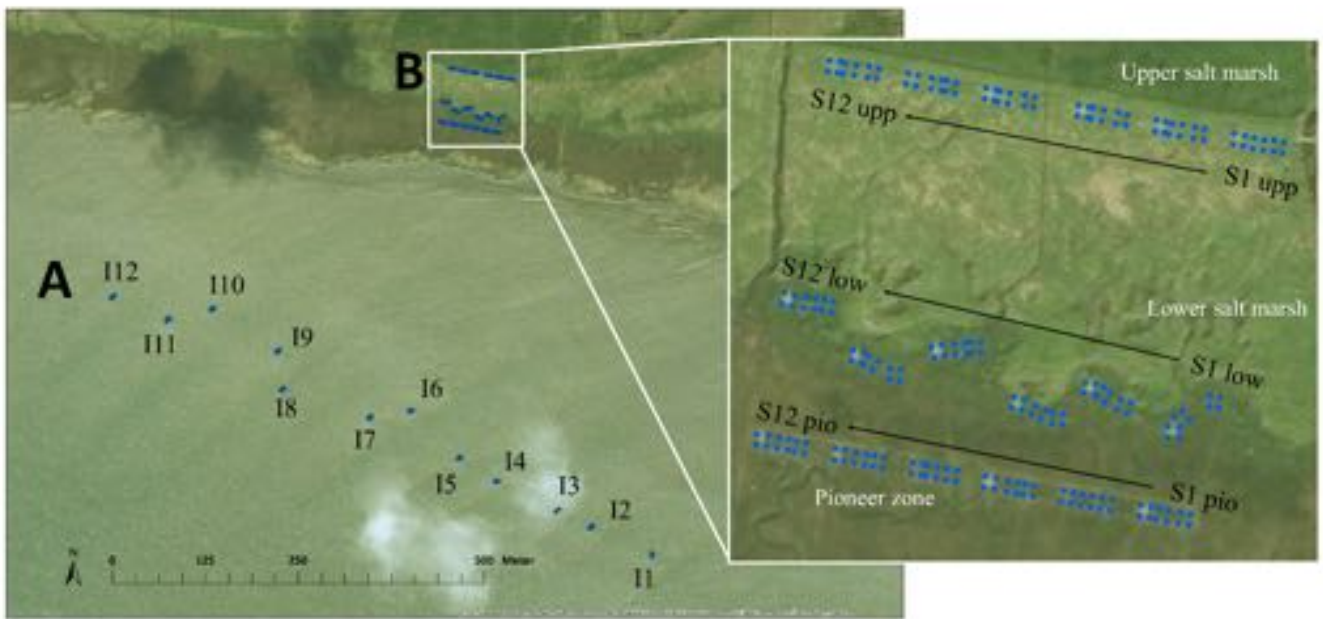

5 Figure 2: Experiment setup with (A) experimental islands in the back-barrier tidal flat and (B) salt marsh control plots at different elevational zones in the salt marsh. Both, island and salt marsh experimental plots are numbered from 1 to 12 from east to west.

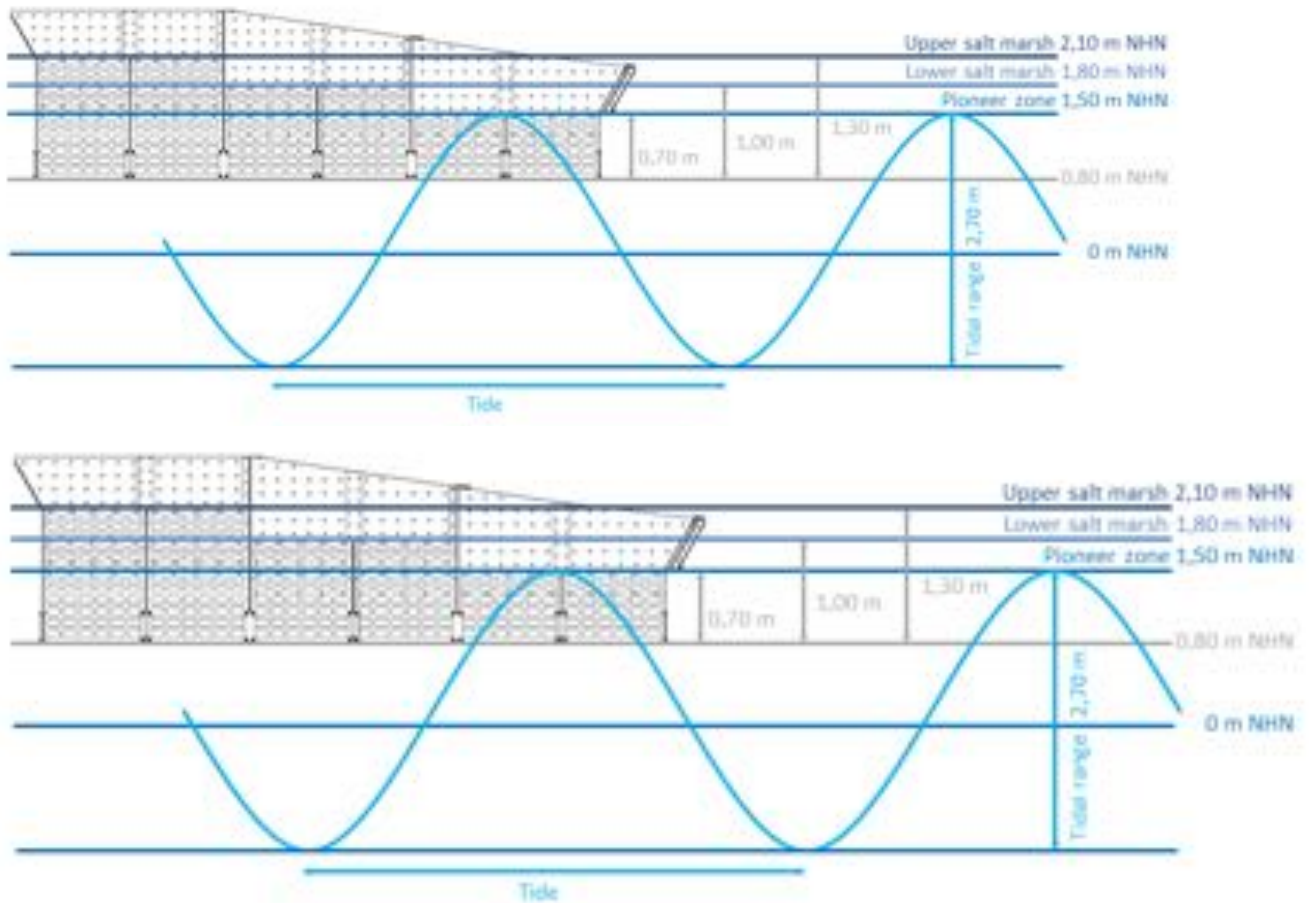

5 | Figure 3: Scheme of an experimental island showing three elevational levels representing natural salt marsh zones. The islands are built on average at 0.8 m NHN (normal height null). Experimental islands outer hull (galvanized steel) is patterned in the upper area to allow for a lateral water exchange. Lower area pattern is only meant to reduce weight and ease construction.

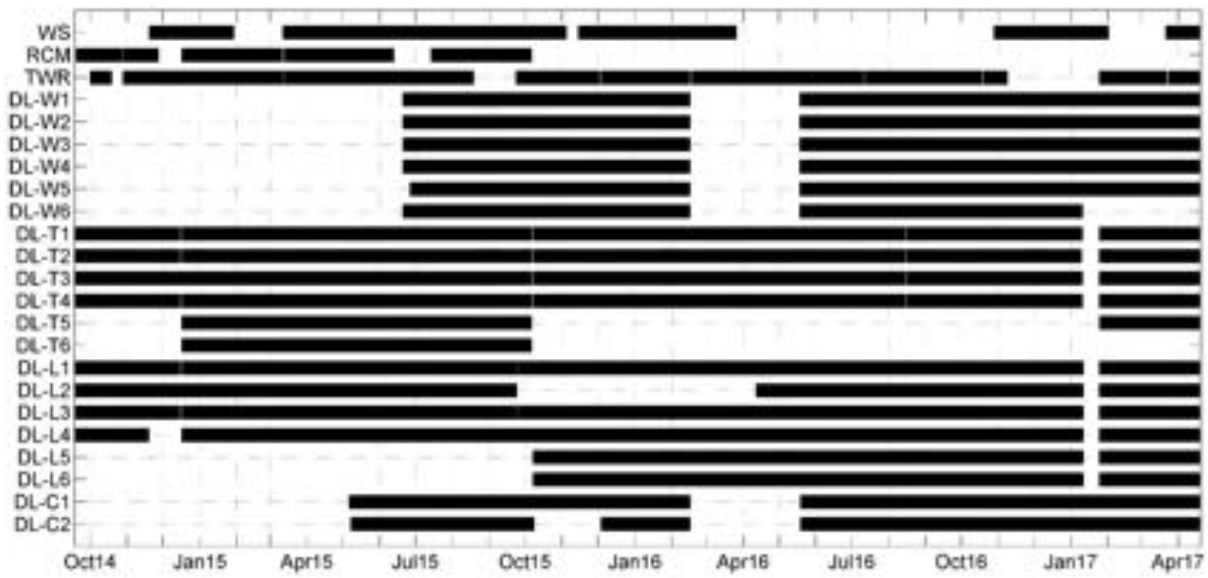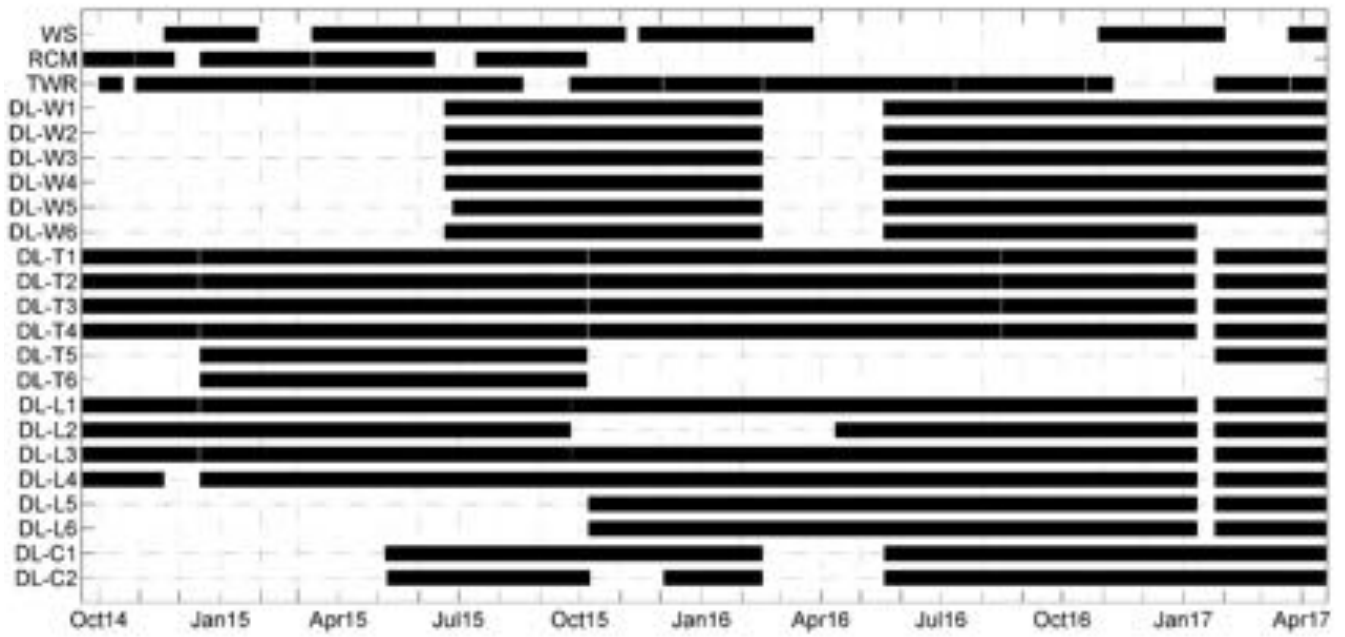

Figure 4: Available data shown in black bars for each sensor or logger type over the sampling period of 18th Sep 2014 to 18th Apr 2017.



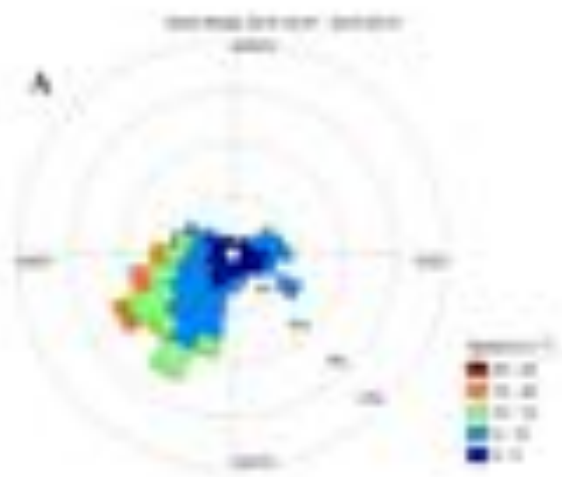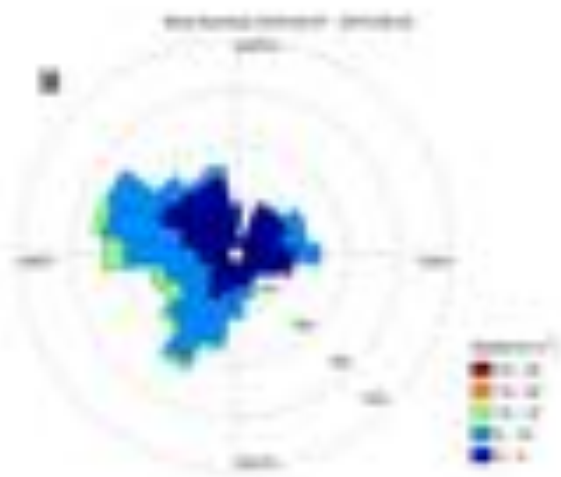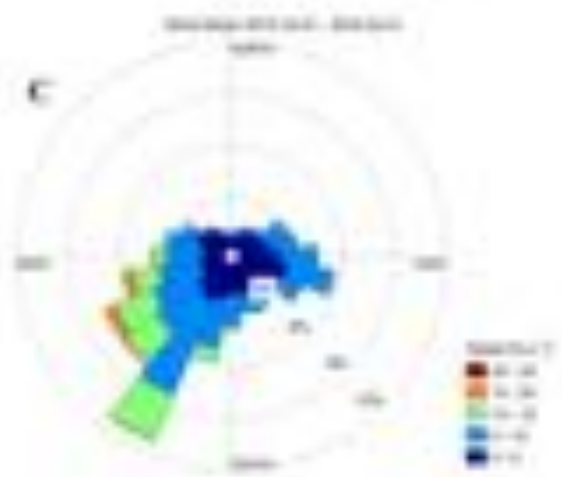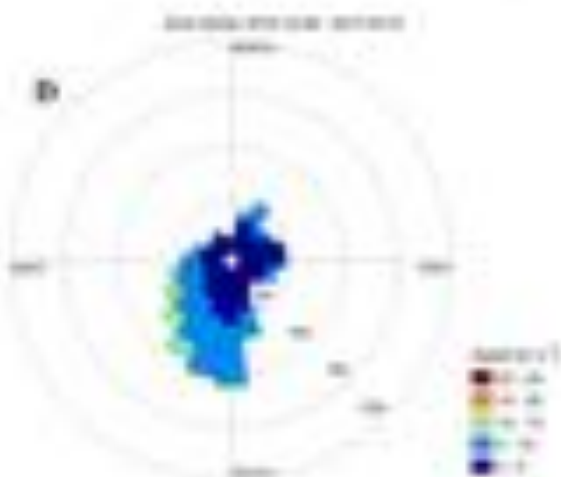

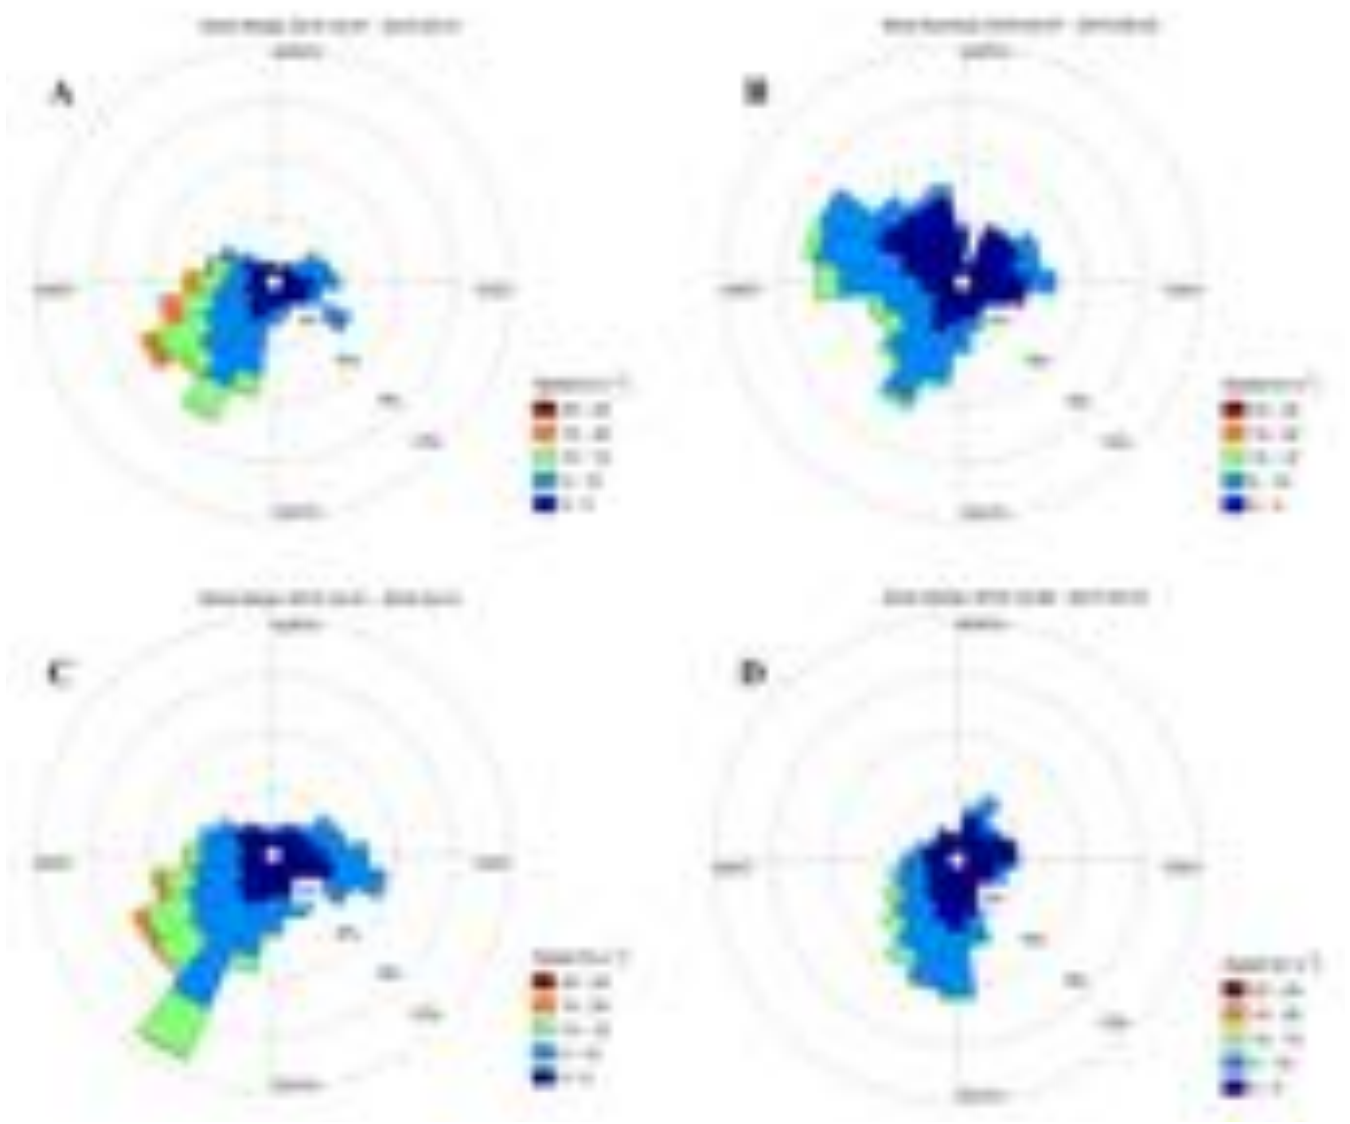

Figure 5: Local wind roses (wind speed and wind direction) for storm seasons (01st Oct - 31st Mar) in 2014/2015 (A), 2015/2016 (C) and 2016/2017 (D) as well as for one summer season (01st Apr - 30th Sep) in 2015 (B).

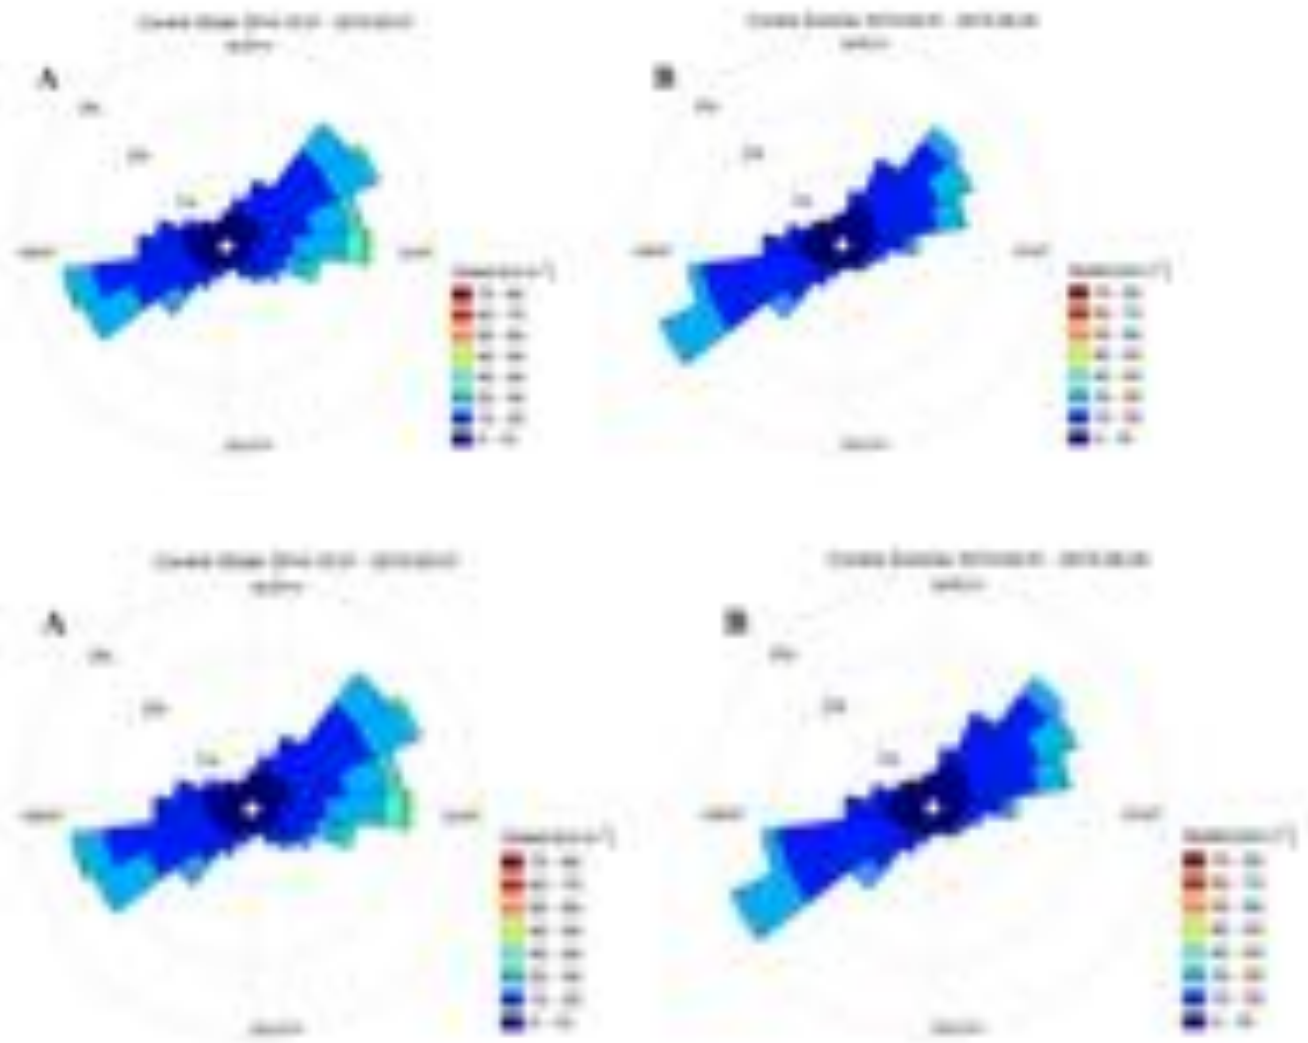

Figure 6: Current conditions in storm season (left) from Oct 2014 to Mar 2015 and summer season (right) from Apr 2015 to Sep 2015 with a main current direction from southwest to northeast.

5

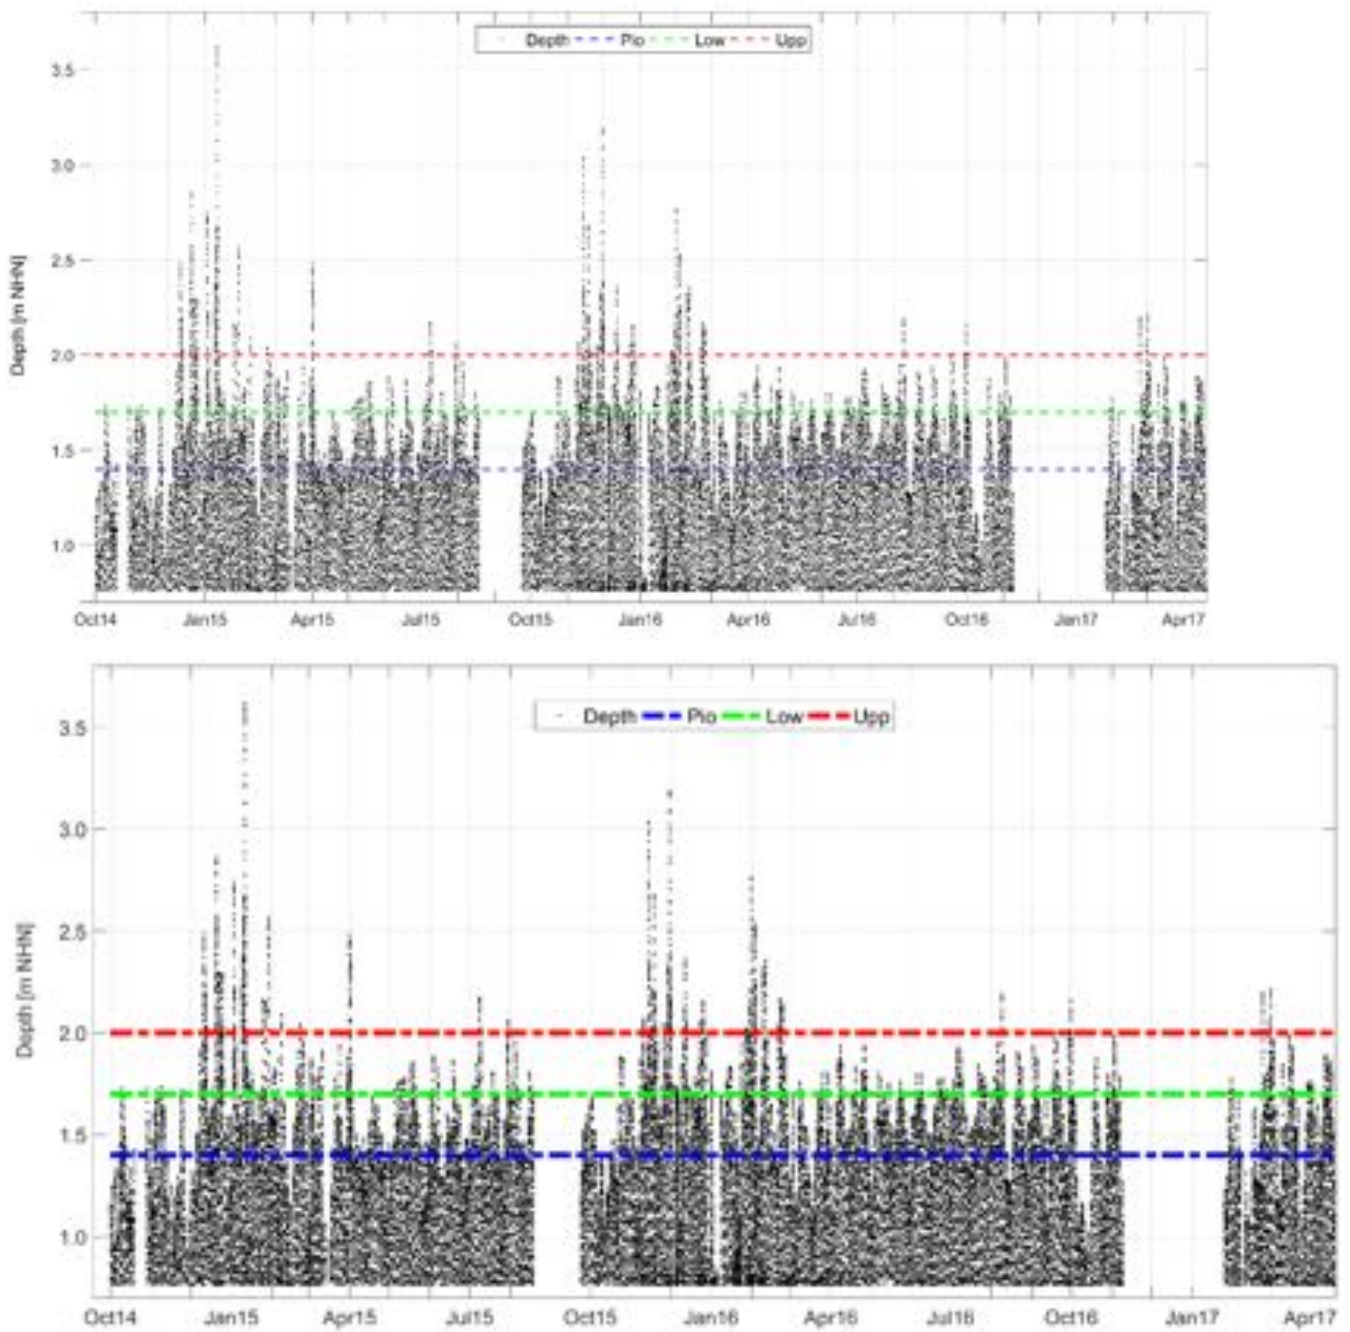

Figure 7: Calculated water depth (black dots) at 0.71 m NHN next to island 6 and 7. The blue line represents the elevation of the pioneer zone, (Pio), the green line is showing the height of the lower salt marsh (Low) and the red line describes the upper salt marsh zone, (Upp). Thus, water level data can give information of flooding periods at the three elevation levels. Low tide data (all data below 0.05 m) was removed before plotting the data. To provide m NHN as a basis ~~all data points~~ 0.71 m were added to the data points.

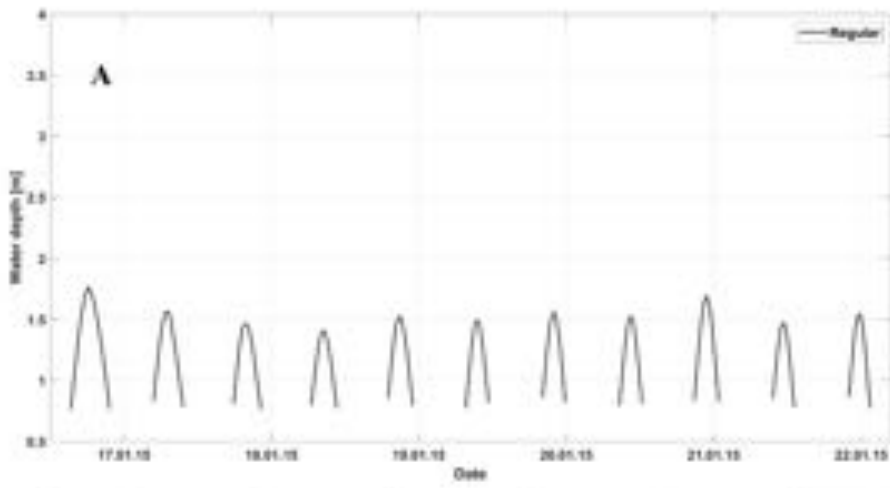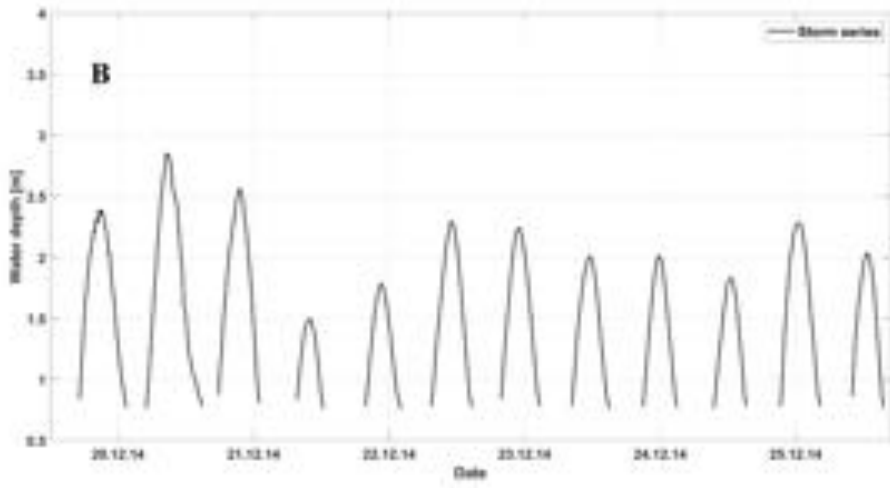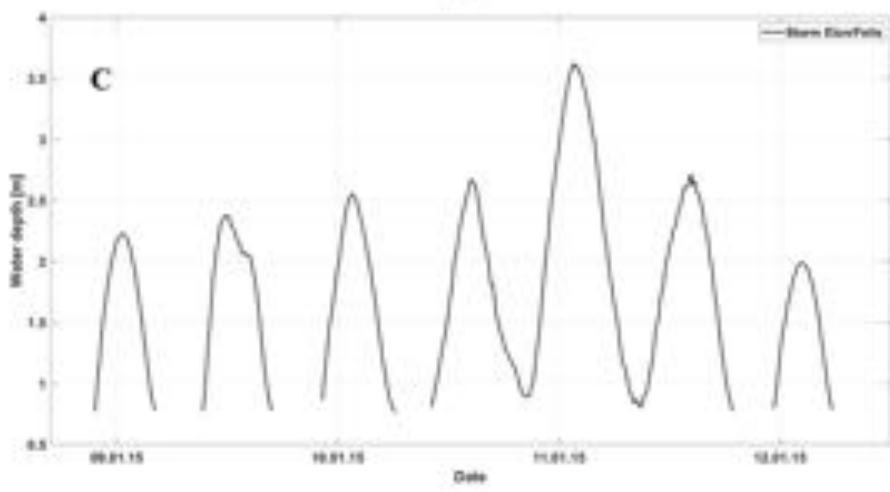

Figure 8: Calculated water depth (black line) during different weather conditions. A shows regular weather and wave conditions from 16th to 22nd Jan 2015. B represent a series of storms with higher water levels from 19th until 25th Dec 2015. At this point highest wave energy values were observed as well as highest significant wave heights. C shows the two big storms Elon and Felix which occurred directly one after the other. Here the highest water level during application time were measured as well as the maximum wave height.

5

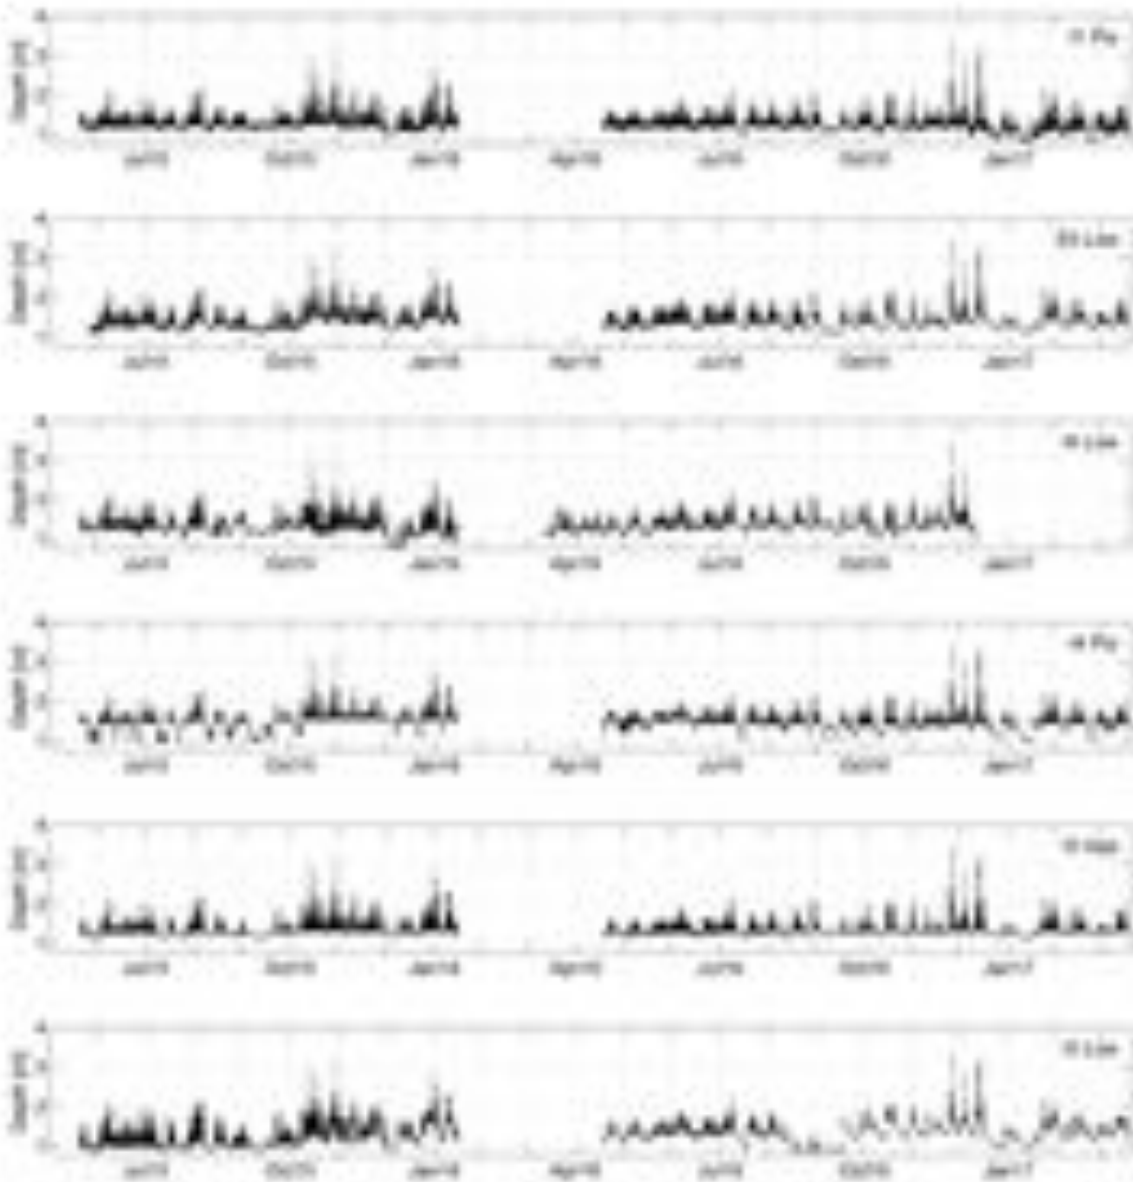

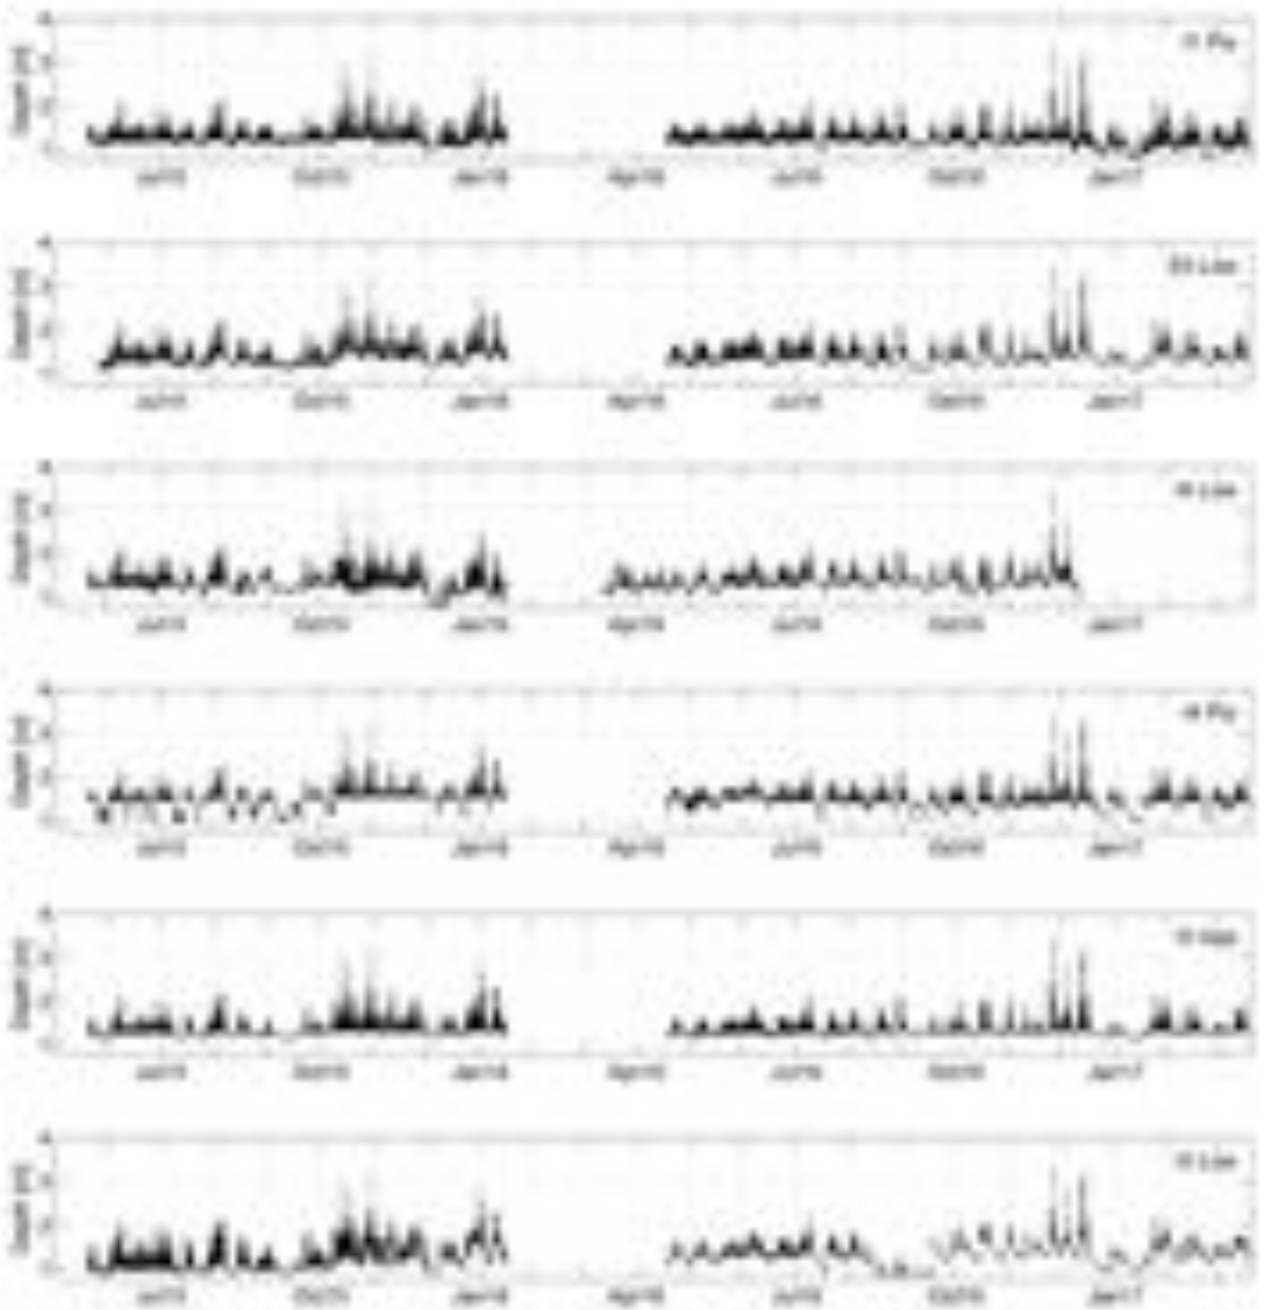

Figure 9: Ground water level within the experimental island and the salt marsh enclosed plot.

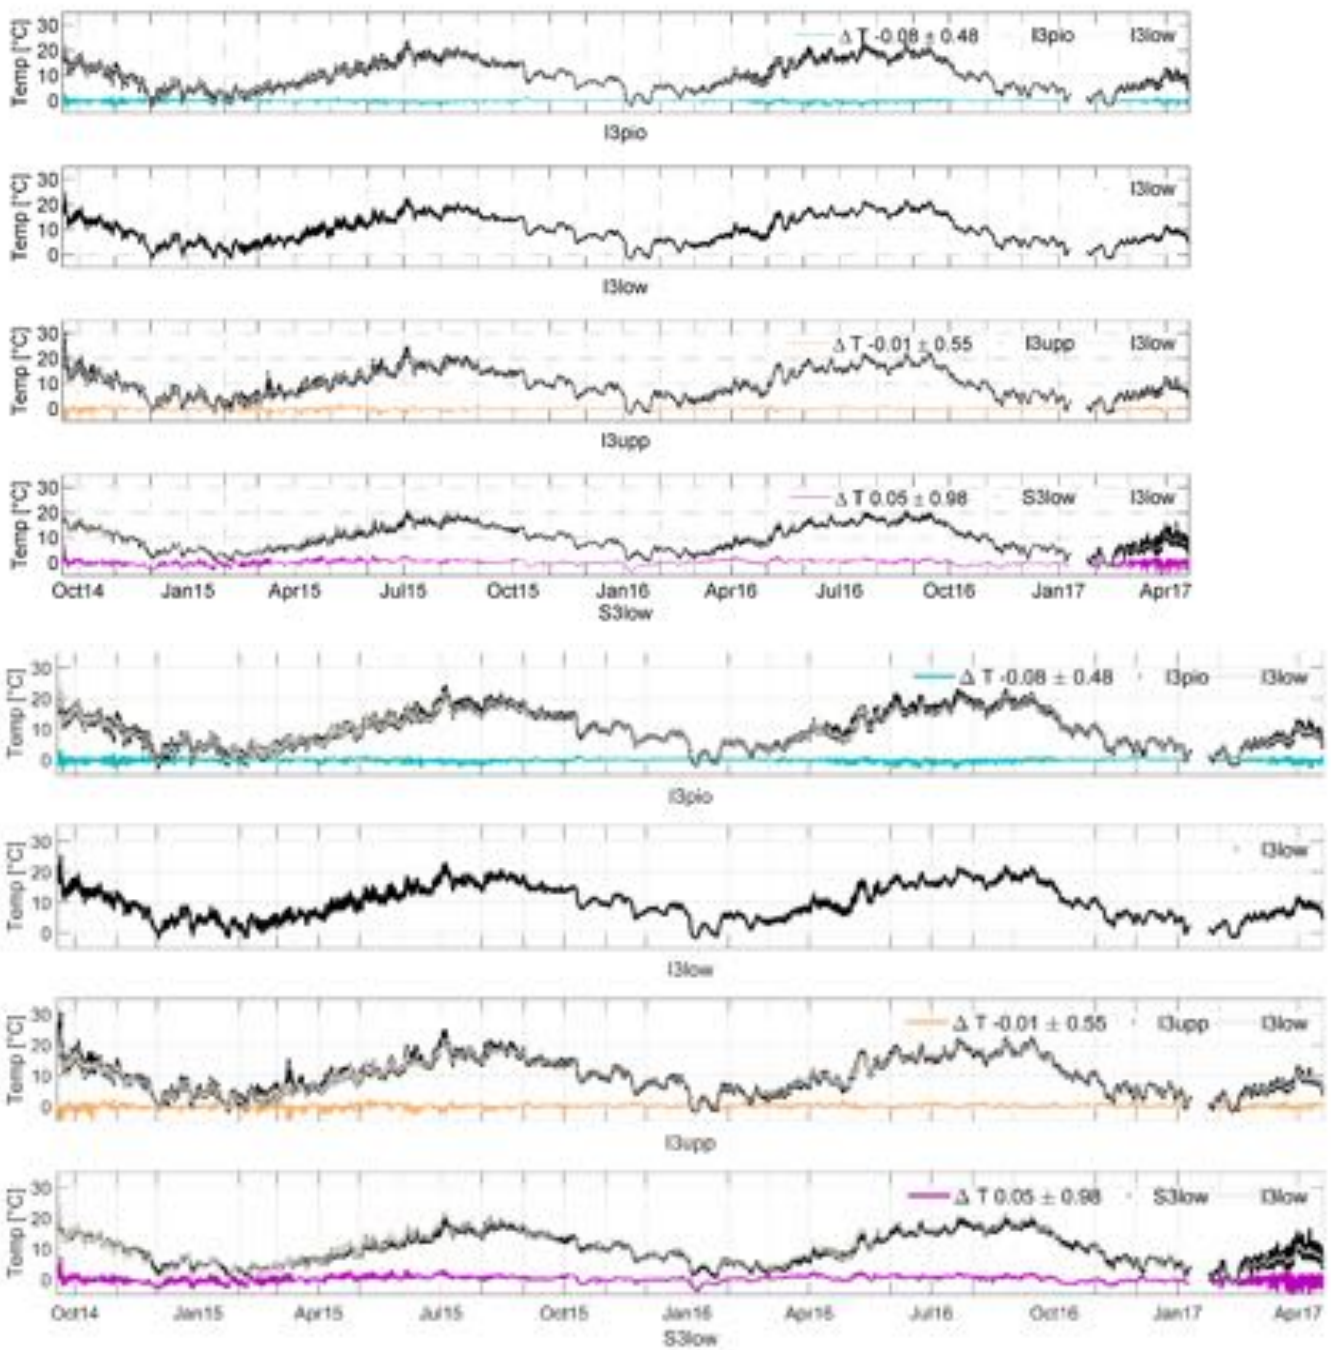

Figure 10: Surface layer temperature and temperature differences over the whole time frame with the DL-T2 (I3 Low) as a basis of computed temperature differences.

5



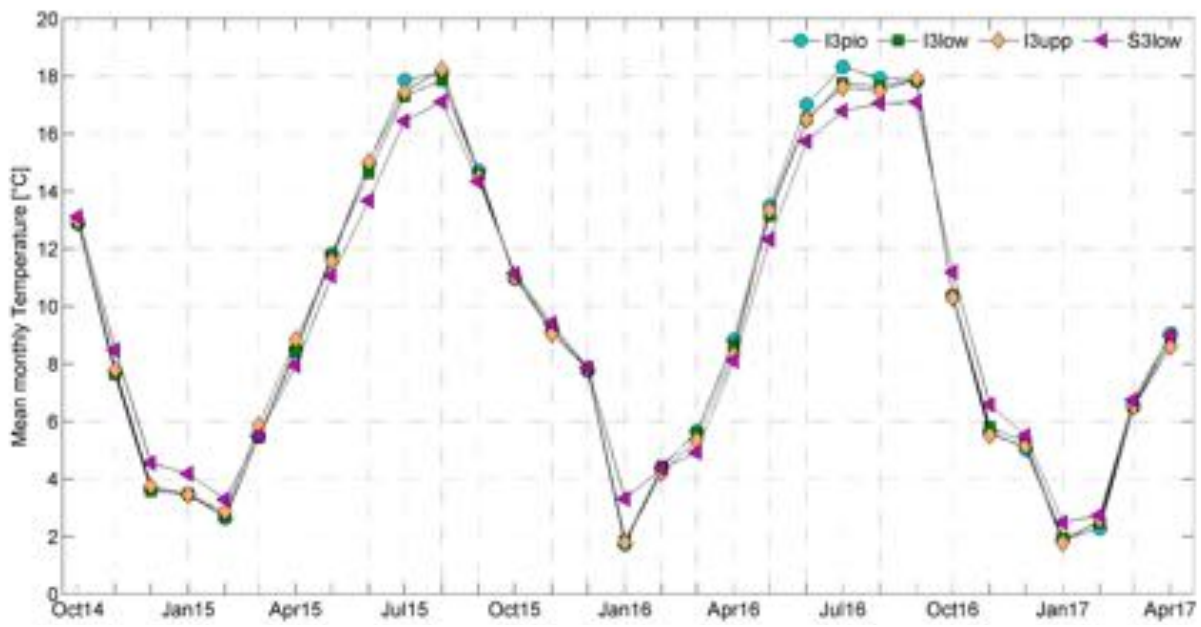

Figure 11: Mean monthly temperature over the whole application time. Since the temperatures within the experimental islands are very similar, a clear offset of the salt marsh enclosed plot temperature could be identified in winter and summer month.

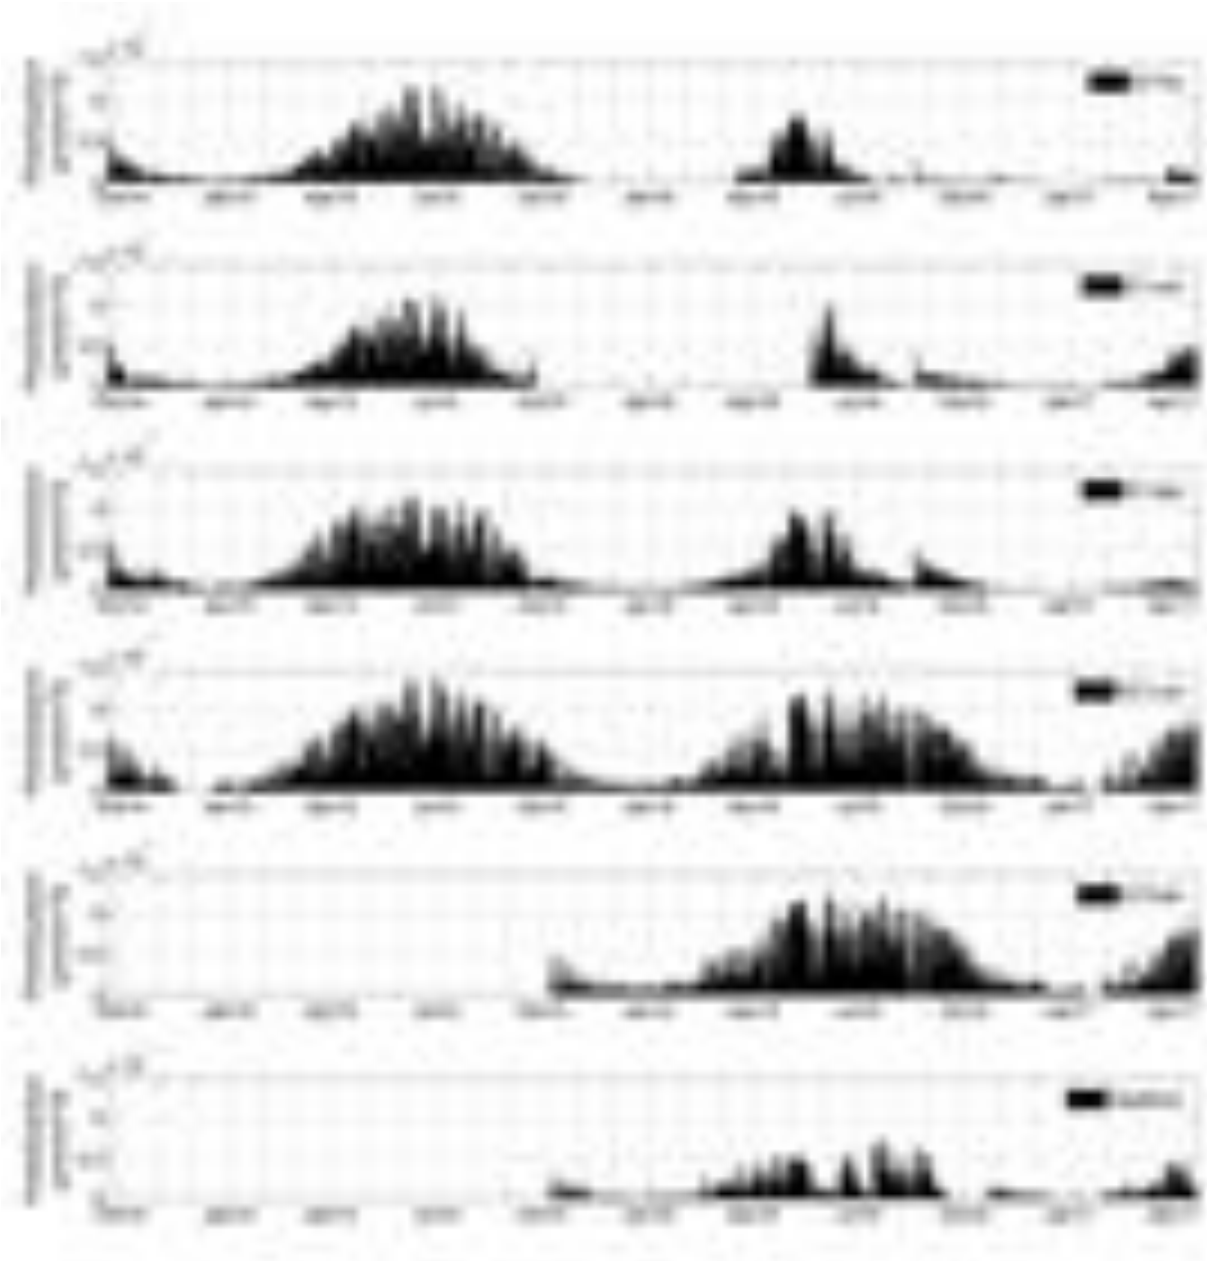

Figure 12: Calculated sum of light intensity per day.

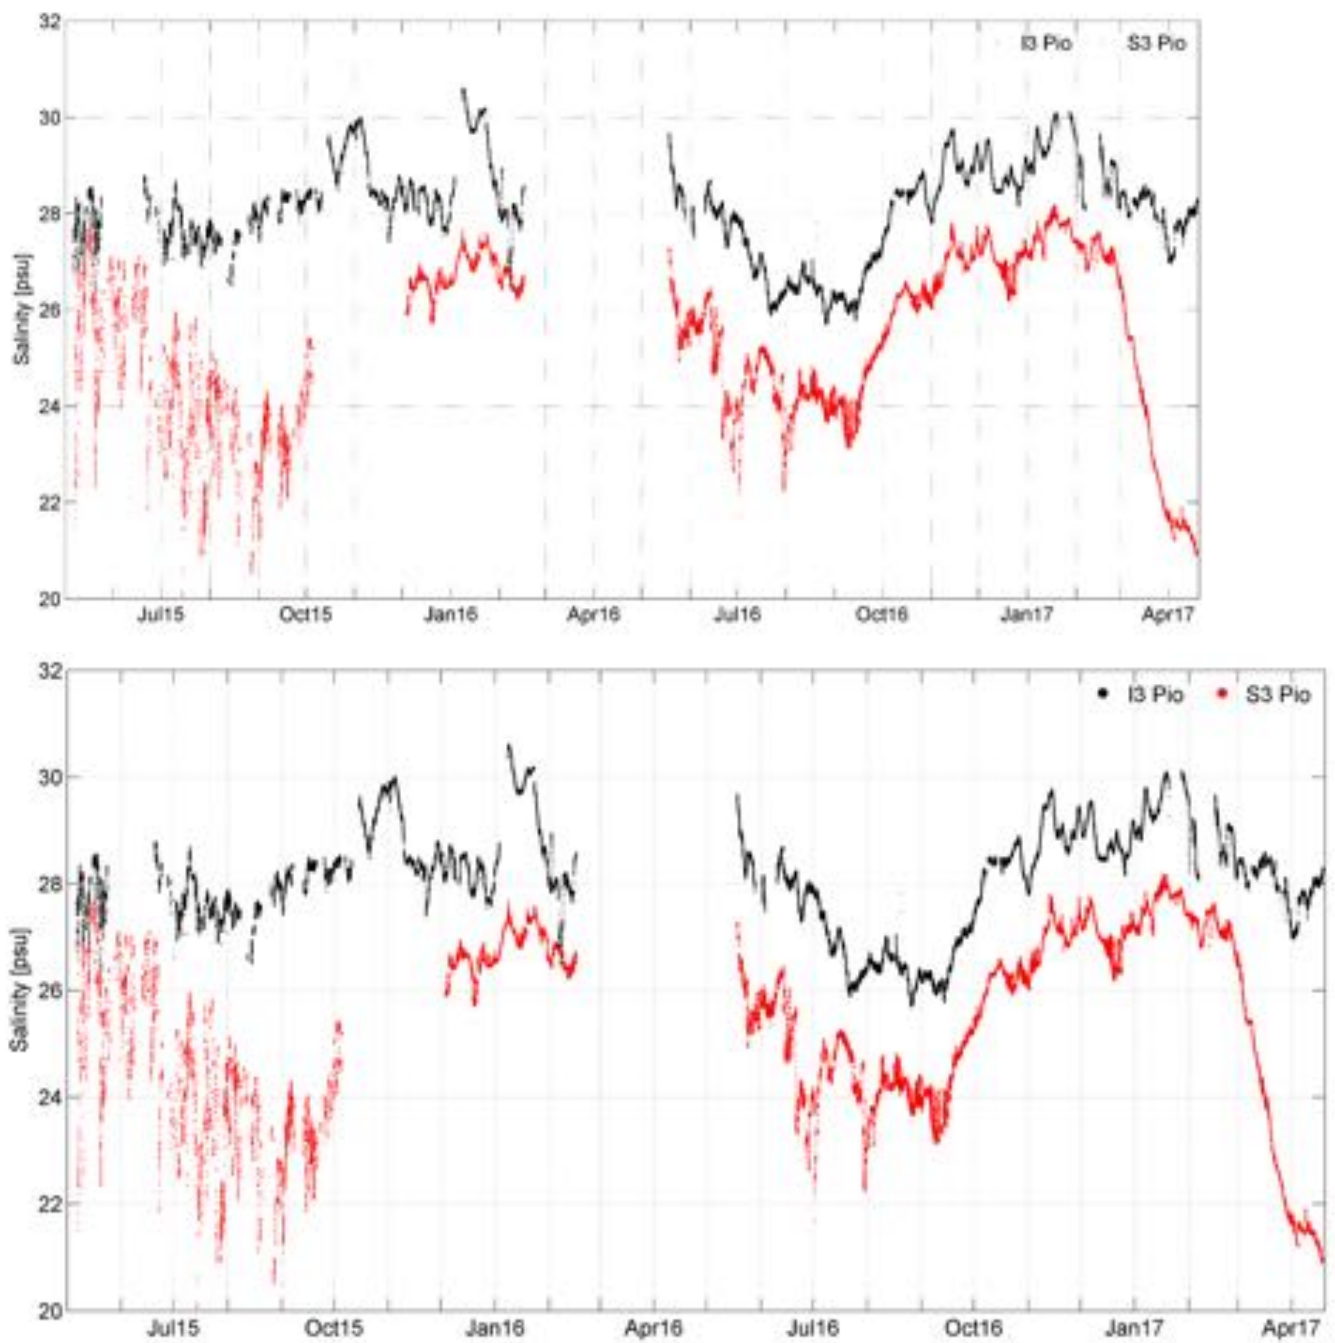

Figure 13: Salinity values within dip wells inside the experimental island and salt marsh enclosed plot. Due to fluctuations in the ground water level conductivity loggers periodically fell dry especially in the beginning. Thus, data until October 2015 are scattered. Thereupon the depth of conductivity loggers were adjusted to deeper in the dip wells assuring a constant covering of water.

**Table 1: Overview of all installed loggers at the experimental island (I) and the salt marsh enclosed plots (S) as well as the nearby installed sensors. WS: weather station, RCM: recording current meter, TWR: tide and wave recorder, DL: data logger.**

| Logger | Name   | Location | Elevation<br>Zone | Latitude      | Longitude    | Height<br>Elevation<br>[m NHN] | Parameter   |
|--------|--------|----------|-------------------|---------------|--------------|--------------------------------|-------------|
| WS     | WS     | Shore    |                   | 53°45'57.10"N | 7°43'34.11"E | 10 m                           | Meteorology |
| RCM    | RCM    | Seafloor |                   | 53°45'29.34"N | 7°43'16.50"E | 0.8 m                          | Current     |
| TWR    | RBR    | Seafloor |                   | 53°45'29.34"N | 7°43'16.50"E | 0.8 m                          | Tide/Wave   |
| DL-W0  | Hobo-P | I 3      | Pole              | 53°45'26.33"N | 7°43'29.16"E | 3.5 m                          | AtmPressure |
| DL-W1  | Hobo-P | I 3      | Upp               | 53°45'26.33"N | 7°43'29.16"E | 1.0 m                          | Depth       |
| DL-W2  | Hobo-P | I 3      | Low               | 53°45'26.38"N | 7°43'29.24"E | 0.9 m                          | Depth       |
| DL-W3  | Hobo-P | I 4      | Pio               | 53°45'27.68"N | 7°43'24.85"E | 1.0 m                          | Depth       |
| DL-W4  | Hobo-P | I 1      | Pio               | 53°45'24.61"N | 7°43'36.26"E | 1.1 m                          | Depth       |
| DL-W5  | Hobo-P | S 3      | Low               | 53°45'43.62"N | 7°43'23.91"E | 0.9 m                          | Depth       |
| DL-W6  | Defi-D | I 4      | Low               | 53°45'27.64"N | 7°43'24.75"E | 1.0 m                          | Depth       |
| DL-T1  | Defi-T | I 3      | Pio               | 53°45'26.42"N | 7°43'29.34"E | 1.4 m                          | Temperature |
| DL-T2  | Defi-T | I 3      | Low               | 53°45'26.38"N | 7°43'29.24"E | 1.7 m                          | Temperature |
| DL-T3  | Defi-T | I 3      | Upp               | 53°45'26.33"N | 7°43'29.16"E | 2.0 m                          | Temperature |
| DL-T4  | Defi-T | S 3      | Low               | 53°45'43.62"N | 7°43'23.91"E | 1.7 m                          | Temperature |
| DL-T5  | Defi-T | S 2      | Upp               | 53°45'45.17"N | 7°43'24.80"E | 2.0 m                          | Temperature |
| DL-T6  | Defi-T | S 2      | Low               | 53°45'43.54"N | 7°43'24.27"E | 1.7 m                          | Temperature |
| DL-L1  | Defi-L | I 3      | Pio               | 53°45'26.42"N | 7°43'29.34"E | 1.4 m                          | Light       |
| DL-L2  | Defi-L | I 3      | Low               | 53°45'26.38"N | 7°43'29.24"E | 1.7 m                          | Light       |
| DL-L3  | Defi-L | I 3      | Upp               | 53°45'26.33"N | 7°43'29.16"E | 2.0 m                          | Light       |
| DL-L4  | Defi-L | S 3      | Low               | 53°45'43.62"N | 7°43'23.91"E | 3.5 m                          | Light       |
| DL-L5  | Defi-L | I 3      | Pole              | 53°45'26.33"N | 7°43'29.16"E | 2.5 m                          | Light       |
| DL-L6  | Defi-L | Seafloor |                   | 53°45'29.34"N | 7°43'16.50"E | 0.8 m                          | Light       |
| DL-C1  | Hobo-C | I 3      | Pio               | 53°45'26.42"N | 7°43'29.34"E | 0.9 m                          | Salinity    |
| DL-C2  | Hobo-C | S 3      | Pio               | 53°45'42.88"N | 7°43'23.55"E | 0.9 m                          | Salinity    |

**Table 2: Structure of the Weather Station (WS) datasets at PANGAEA.**

| # | Name      | Short Name | Unit |
|---|-----------|------------|------|
| 1 | DATE/TIME | Date/Time  |      |

|    |                                                           |                         |      |
|----|-----------------------------------------------------------|-------------------------|------|
| 2  | ALTITUDE                                                  | Altitude                | m    |
| 3  | Wind speed                                                | ff                      | m/s  |
| 4  | Wind direction                                            | dd                      | deg  |
| 5  | Temperature, air                                          | TTT                     | degC |
| 6  | Humidity, relative                                        | RH                      | %    |
| 7  | Brightness, North                                         | Brightness              | lux  |
| 8  | Brightness, East                                          | Brightness              | lux  |
| 9  | Brightness, South                                         | Brightness              | lux  |
| 10 | Brightness, West                                          | Brightness              | lux  |
| 11 | Brightness, Max                                           | Brightness              | lux  |
| 12 | Brightness direction                                      | Brightness dir          | deg  |
| 13 | Indicator for inclusion or omission of precipitation data | Indicator precipitation | code |
| 14 | Precipitation, daily total                                | Precip day total        | mm   |
| 15 | Precipitation                                             | Precip                  | mm/h |
| 16 | Precipitation description                                 | Precip descry           |      |
| 17 | Solar elevation                                           | SE                      | deg  |
| 18 | Solar azimuth angle                                       | SAA                     | deg  |

**Table 3: Structure of the Recording Current Meter (RCM) datasets at PANGAEA.**

| # | Name               | Short Name  | Unit  |
|---|--------------------|-------------|-------|
| 1 | DATE/TIME          | Date/Time   |       |
| 2 | Depth, water       | Depth water | m     |
| 3 | Current speed      | V           | cm/s  |
| 4 | Current direction  | DIR         | deg   |
| 5 | Temperature, water | Temp        | degC  |
| 6 | Conductivity       | Cond        | mS/cm |
| 7 | Pressure, raw      | Press raw   | dbar  |

**Table 4: Structure of the Tide and Wave Recorder (TWR) datasets PANGAEA.**

| # | Name         | Short Name  | Unit |
|---|--------------|-------------|------|
| 1 | DATE/TIME    | Date/Time   |      |
| 2 | Depth, water | Depth water | m    |

|    |                          |             |                  |
|----|--------------------------|-------------|------------------|
| 3  | Tidal slope              | Tidal slope |                  |
| 4  | Wave height, significant | H(1/3)      | m                |
| 5  | Wave period, significant | T(1/3)      | s                |
| 6  | Wave height, tenth       | H(1/10)     | m                |
| 7  | Wave period, tenth       | T(1/10)     | s                |
| 8  | Wave height, maximum     | H(max)      | m                |
| 9  | Wave period, maximum     | T(max)      | s                |
| 10 | Wave height, average     | H(avg)      | m                |
| 11 | Wave period, average     | T(avg)      | s                |
| 12 | Wave energy              | Wave energy | J/m <sup>2</sup> |
| 13 | Temperature, water       | Temp        | degC             |
| 14 | Pressure, raw            | Press raw   | dbar             |

**Table 5: Structure of the Water Level Loggers (DL-W) datasets at PANGAEA.**

| # | Name        | Short Name  | Unit |
|---|-------------|-------------|------|
| 1 | DATE/TIME   | Date/Time   |      |
| 2 | Water level | Water level | m    |

**Table 6: Structure of the Temperature Loggers (DL-T) datasets at PANGAEA.**

| # | Name                          | Short Name | Unit |
|---|-------------------------------|------------|------|
| 1 | DATE/TIME                     | Date/Time  |      |
| 2 | Depth, sediment/rock          | Depth      | m    |
| 3 | Temperature, in rock/sediment | t          | degC |

5

**Table 7: Structure of Light Loggers (DL-L) datasets at PANGAEA.**

| # | Name            | Short Name | Unit                   |
|---|-----------------|------------|------------------------|
| 1 | DATE/TIME       | Date/Time  |                        |
| 2 | Light intensity | Io         | μmol/m <sup>2</sup> /s |

**Table 8: Structure of Conductivity Logger (DL-C) datasets at PANGAEA.**

| # | Name      | Short Name | Unit |
|---|-----------|------------|------|
| 1 | DATE/TIME | Date/Time  |      |



|              |                                                                      |                                                                      |                                     |                                    |                                    |                                    |                                    |                                    |                                    |                                    |                                    |
|--------------|----------------------------------------------------------------------|----------------------------------------------------------------------|-------------------------------------|------------------------------------|------------------------------------|------------------------------------|------------------------------------|------------------------------------|------------------------------------|------------------------------------|------------------------------------|
|              | <u>9</u><br><u>3</u><br><u>5</u><br><u>1</u>                         | <u>9</u><br><u>8</u><br><u>0</u>                                     | <u>7</u><br><u>7</u>                | <u>7</u><br><u>7</u>               | <u>7</u><br><u>7</u>               | <u>7</u><br><u>7</u>               | <u>4</u><br><u>1</u>               | <u>1</u><br><u>5</u>               | <u>9</u><br><u>0</u>               | <u>9</u><br><u>4</u>               |                                    |
| <u>D x</u>   | <u>8</u><br><u>8</u><br><u>2</u>                                     | <u>3</u><br><u>8</u><br><u>4</u>                                     | <u>93</u><br><u>1</u>               | <u>66</u><br><u>9</u>              | <u>66</u><br><u>9</u>              | <u>66</u><br><u>9</u>              | <u>66</u><br><u>9</u>              | <u>66</u><br><u>3</u>              | <u>57</u><br><u>1</u>              | <u>71</u><br><u>4</u>              | <u>71</u><br><u>3</u>              |
| <u>% x1</u>  | <u>6</u><br><u>4</u><br><u>7</u><br><u>4</u>                         | <u>8</u><br><u>7</u><br><u>2</u><br><u>4</u>                         | <u>87</u><br><u>2</u><br><u>2</u>   | <u>86</u><br><u>4</u><br><u>0</u>  | <u>86</u><br><u>4</u><br><u>0</u>  | <u>86</u><br><u>4</u><br><u>0</u>  | <u>86</u><br><u>4</u><br><u>0</u>  | <u>86</u><br><u>2</u><br><u>7</u>  | <u>84</u><br><u>0</u><br><u>6</u>  | <u>87</u><br><u>3</u><br><u>9</u>  | <u>79</u><br><u>5</u><br><u>2</u>  |
| <u>% x0</u>  | <u>3</u><br><u>5</u><br><u>2</u><br><u>6</u>                         | <u>1</u><br><u>2</u><br><u>7</u><br><u>6</u>                         | <u>12</u><br><u>7</u><br><u>8</u>   | <u>13</u><br><u>6</u><br><u>0</u>  | <u>13</u><br><u>6</u><br><u>0</u>  | <u>13</u><br><u>6</u><br><u>0</u>  | <u>13</u><br><u>6</u><br><u>0</u>  | <u>13</u><br><u>7</u><br><u>3</u>  | <u>15</u><br><u>9</u><br><u>4</u>  | <u>12</u><br><u>6</u><br><u>1</u>  | <u>20</u><br><u>4</u><br><u>8</u>  |
|              |                                                                      |                                                                      |                                     |                                    |                                    |                                    |                                    |                                    |                                    |                                    |                                    |
| <u>Sum 1</u> | <u>8</u><br><u>1</u><br><u>6</u><br><u>0</u><br><u>5</u><br><u>0</u> | <u>4</u><br><u>7</u><br><u>4</u><br><u>9</u><br><u>9</u><br><u>0</u> | <u>11</u><br><u>55</u><br><u>35</u> | <u>82</u><br><u>99</u><br><u>7</u> | <u>82</u><br><u>99</u><br><u>9</u> | <u>83</u><br><u>00</u><br><u>0</u> | <u>83</u><br><u>00</u><br><u>2</u> | <u>82</u><br><u>11</u><br><u>2</u> | <u>68</u><br><u>85</u><br><u>0</u> | <u>89</u><br><u>48</u><br><u>1</u> | <u>81</u><br><u>29</u><br><u>7</u> |
| <u>Sum 0</u> | <u>5</u><br><u>4</u><br><u>2</u><br><u>4</u><br><u>1</u><br><u>0</u> | <u>8</u><br><u>8</u><br><u>3</u><br><u>5</u><br><u>6</u>             | <u>20</u><br><u>31</u><br><u>1</u>  | <u>52</u><br><u>84</u><br><u>9</u> | <u>52</u><br><u>84</u><br><u>7</u> | <u>52</u><br><u>84</u><br><u>6</u> | <u>52</u><br><u>84</u><br><u>4</u> | <u>53</u><br><u>73</u><br><u>4</u> | <u>66</u><br><u>99</u><br><u>6</u> | <u>46</u><br><u>36</u><br><u>5</u> | <u>54</u><br><u>54</u><br><u>9</u> |
| <u>%S 1</u>  | <u>6</u><br><u>0</u><br><u>0</u><br><u>7</u>                         | <u>3</u><br><u>4</u><br><u>9</u><br><u>6</u>                         | <u>85</u><br><u>0</u><br><u>5</u>   | <u>61</u><br><u>1</u><br><u>0</u>  | <u>61</u><br><u>1</u><br><u>0</u>  | <u>61</u><br><u>1</u><br><u>0</u>  | <u>61</u><br><u>1</u><br><u>0</u>  | <u>60</u><br><u>4</u><br><u>4</u>  | <u>50</u><br><u>6</u><br><u>8</u>  | <u>65</u><br><u>8</u><br><u>7</u>  | <u>59</u><br><u>8</u><br><u>4</u>  |
| <u>%S 0</u>  | <u>3</u><br><u>6</u>                                                 | <u>14</u>                                                            | <u>38</u>                           | <u>38</u>                          | <u>38</u>                          | <u>38</u>                          | <u>39</u>                          | <u>49</u>                          | <u>34</u>                          | <u>40</u>                          |                                    |











|                      |       |        |        |        |      |
|----------------------|-------|--------|--------|--------|------|
| Temperature [°C]     | -0,68 | 27,30  | 10,69  | 10,25  | 5,43 |
| Conductivity [mS/cm] | 24,39 | 50,60  | 33,82  | 32,08  | 4,97 |
| Pressure [kPa]       | 93,74 | 136,71 | 103,78 | 101,60 | 4,03 |

**Table 12: Minima, maxima and mean values as well as median and standard deviation of the Tide and Wave Recorder (TWR) from 01<sup>st</sup> Oct 2014 to 18<sup>th</sup> Apr 2017 on 812 days.**

| <b>TWR</b>                 | <b>Min</b> | <b>Max</b> | <b>Mean</b> | <b>Median</b> | <b>SD</b> |
|----------------------------|------------|------------|-------------|---------------|-----------|
| Depth [m]                  | 0,69       | 3,62       | 1,23        | 1,19          | 0,35      |
| Tdslope                    | -1,48      | 1,08       | 0,00        | 0,00          | 0,21      |
| H(1/3) [m]                 | 0,00       | 0,73       | 0,03        | 0,00          | 0,06      |
| T(1/3) [s]                 | 0,00       | 271,00     | 3,58        | 1,66          | 9,60      |
| H(1/10) [m]                | 0,00       | 0,96       | 0,04        | 0,00          | 0,08      |
| T(1/10) [s]                | 0,00       | 272,67     | 5,47        | 1,68          | 14,12     |
| H(max) [m]                 | 0,00       | 2,14       | 0,05        | 0,00          | 0,10      |
| T(max) [s]                 | 0,00       | 288,33     | 7,97        | 1,67          | 20,29     |
| H(avg) [m]                 | 0,00       | 0,51       | 0,02        | 0,00          | 0,04      |
| T(avg) [s]                 | 0,00       | 288,33     | 2,01        | 1,46          | 4,84      |
| Energy [J/m <sup>2</sup> ] | 0,00       | 400,90     | 3,67        | 0,00          | 14,02     |
| Temp [°C]                  | -6,10      | 31,87      | 10,00       | 9,29          | 6,20      |
| Pressure raw [dbar]        | 9,71       | 12,98      | 10,36       | 10,25         | 0,33      |

- 5 **Table 13: Minima, maxima and mean values as well as median and standard deviation of the ground water level data (DL-W 1-6) for each logger application time from 20<sup>th</sup> Jun 2015 to 18<sup>th</sup> Apr 2017 on 578 days (572 days within the salt marsh enclosed plot).**

| <b>DL-W</b>                 | <b>Min</b> | <b>Max</b> | <b>Mean</b> | <b>Median</b> | <b>SD</b> |
|-----------------------------|------------|------------|-------------|---------------|-----------|
| DL-W1 Water level I3upp [m] | 1,03       | 3,44       | 1,33        | 1,30          | 0,15      |
| DL-W2 Water level I3low [m] | 0,88       | 3,34       | 1,28        | 1,27          | 0,27      |
| DL-W3 Water level I4pio [m] | 0,93       | 3,56       | 1,45        | 1,48          | 0,20      |
| DL-W4 Water level I1pio [m] | 0,78       | 3,39       | 1,25        | 1,23          | 0,17      |
| DL-W5 Water level S3low [m] | 0,87       | 3,38       | 1,39        | 1,35          | 0,19      |
| DL-W6 Water level I4low [m] | 0,64       | 3,43       | 1,35        | 1,33          | 0,20      |

**Table 14: Minima, maxima and mean values as well as median and standard deviation of the temperature data (DL-T 1-6) from 18<sup>th</sup> Sep 2014 until 18<sup>th</sup> Apr 2017 on 931 daysTable.**

| DL-T                          | Min   | Max   | Mean | Median | SD   |
|-------------------------------|-------|-------|------|--------|------|
| DL-T1 Temperature I3 Pio [°C] | -2,60 | 24,14 | 9,78 | 9,12   | 5,74 |
| DL-T2 Temperature I3 Low [°C] | -1,75 | 25,09 | 9,70 | 9,05   | 5,56 |
| DL-T3 Temperature I3 Upp [°C] | -1,87 | 30,43 | 9,70 | 9,07   | 5,66 |
| DL-T4 Temperature S3 Low [°C] | -1,52 | 21,12 | 9,64 | 9,16   | 5,02 |

**Table 15: Minima, maxima and mean values as well as median and standard deviation of the light intensity data (DL-L 1-6) for each logger application time and separated in years (2014 – 2017).**

| DL-L                                                            | Min   | Max     | Mean   | Median | SD     |
|-----------------------------------------------------------------|-------|---------|--------|--------|--------|
| DL-L1 Light I3pio [ $\mu\text{mol}/(\text{m}^2\text{s})$ ]      | 0,00  | 2774,60 | 105,16 | 0,50   | 291,63 |
| DL-L2 Light I3low [ $\mu\text{mol}/(\text{m}^2\text{s})$ ]      | -0,40 | 2603,30 | 120,22 | 1,10   | 301,43 |
| DL-L3 Light I3upp [ $\mu\text{mol}/(\text{m}^2\text{s})$ ]      | 0,00  | 2609,70 | 141,10 | 0,80   | 343,06 |
| DL-L4 Light S3low [ $\mu\text{mol}/(\text{m}^2\text{s})$ ]      | 0,20  | 2657,80 | 244,58 | 4,20   | 435,98 |
| DL-L5 Light I3upp pole [ $\mu\text{mol}/(\text{m}^2\text{s})$ ] | -0,30 | 2706,30 | 222,82 | 1,10   | 412,30 |
| DL-L6 Light sea floor [ $\mu\text{mol}/(\text{m}^2\text{s})$ ]  | 0,00  | 2058,10 | 85,15  | 0,50   | 196,23 |

- 5 **Table 16: Minima, maxima and mean values as well as median and standard deviation of the salinity data (DL-C 1-2) for each logger application time and separated in years (2015 – 2017).**

| DL-C                  | Min   | Max   | Mean  | Median | SD   |
|-----------------------|-------|-------|-------|--------|------|
| DL-C1 Sal I3pio [ppt] | 20,00 | 30,61 | 27,95 | 28,17  | 1,22 |
| DL-C2 Sal S3pio [ppt] | 20,04 | 28,17 | 25,45 | 25,91  | 1,74 |
